# Supplementary material
Source: PubMed Central journal article supplement (PMC10357365)

**Full unedited gels  
images**

# Full unedited gel for Figure 1A

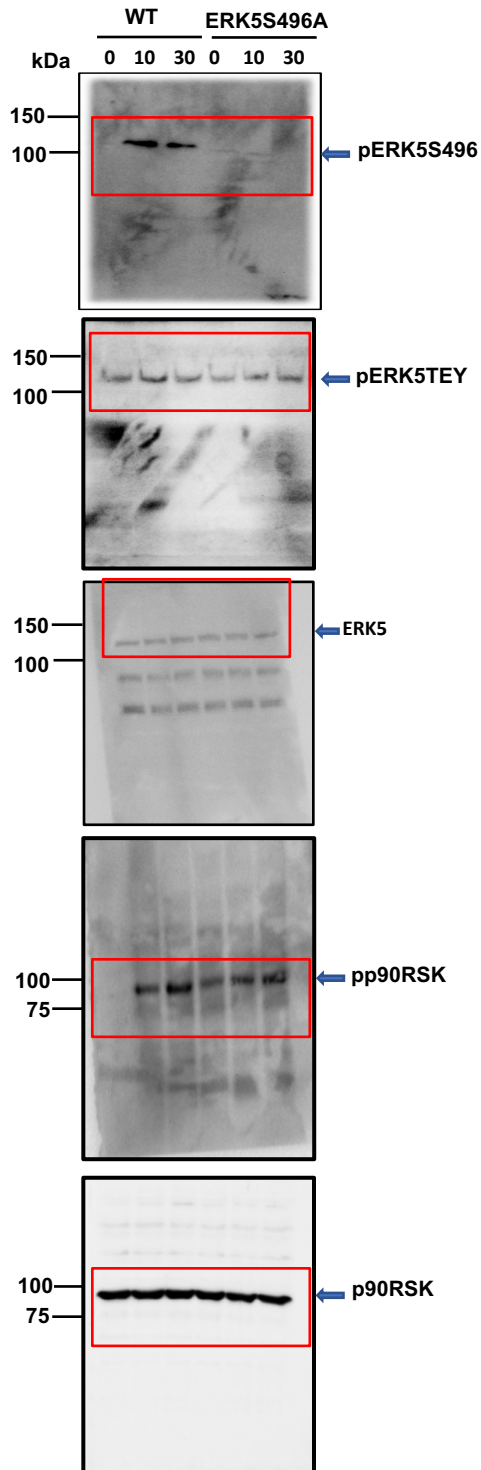

# Full unedited gel for Figure 1

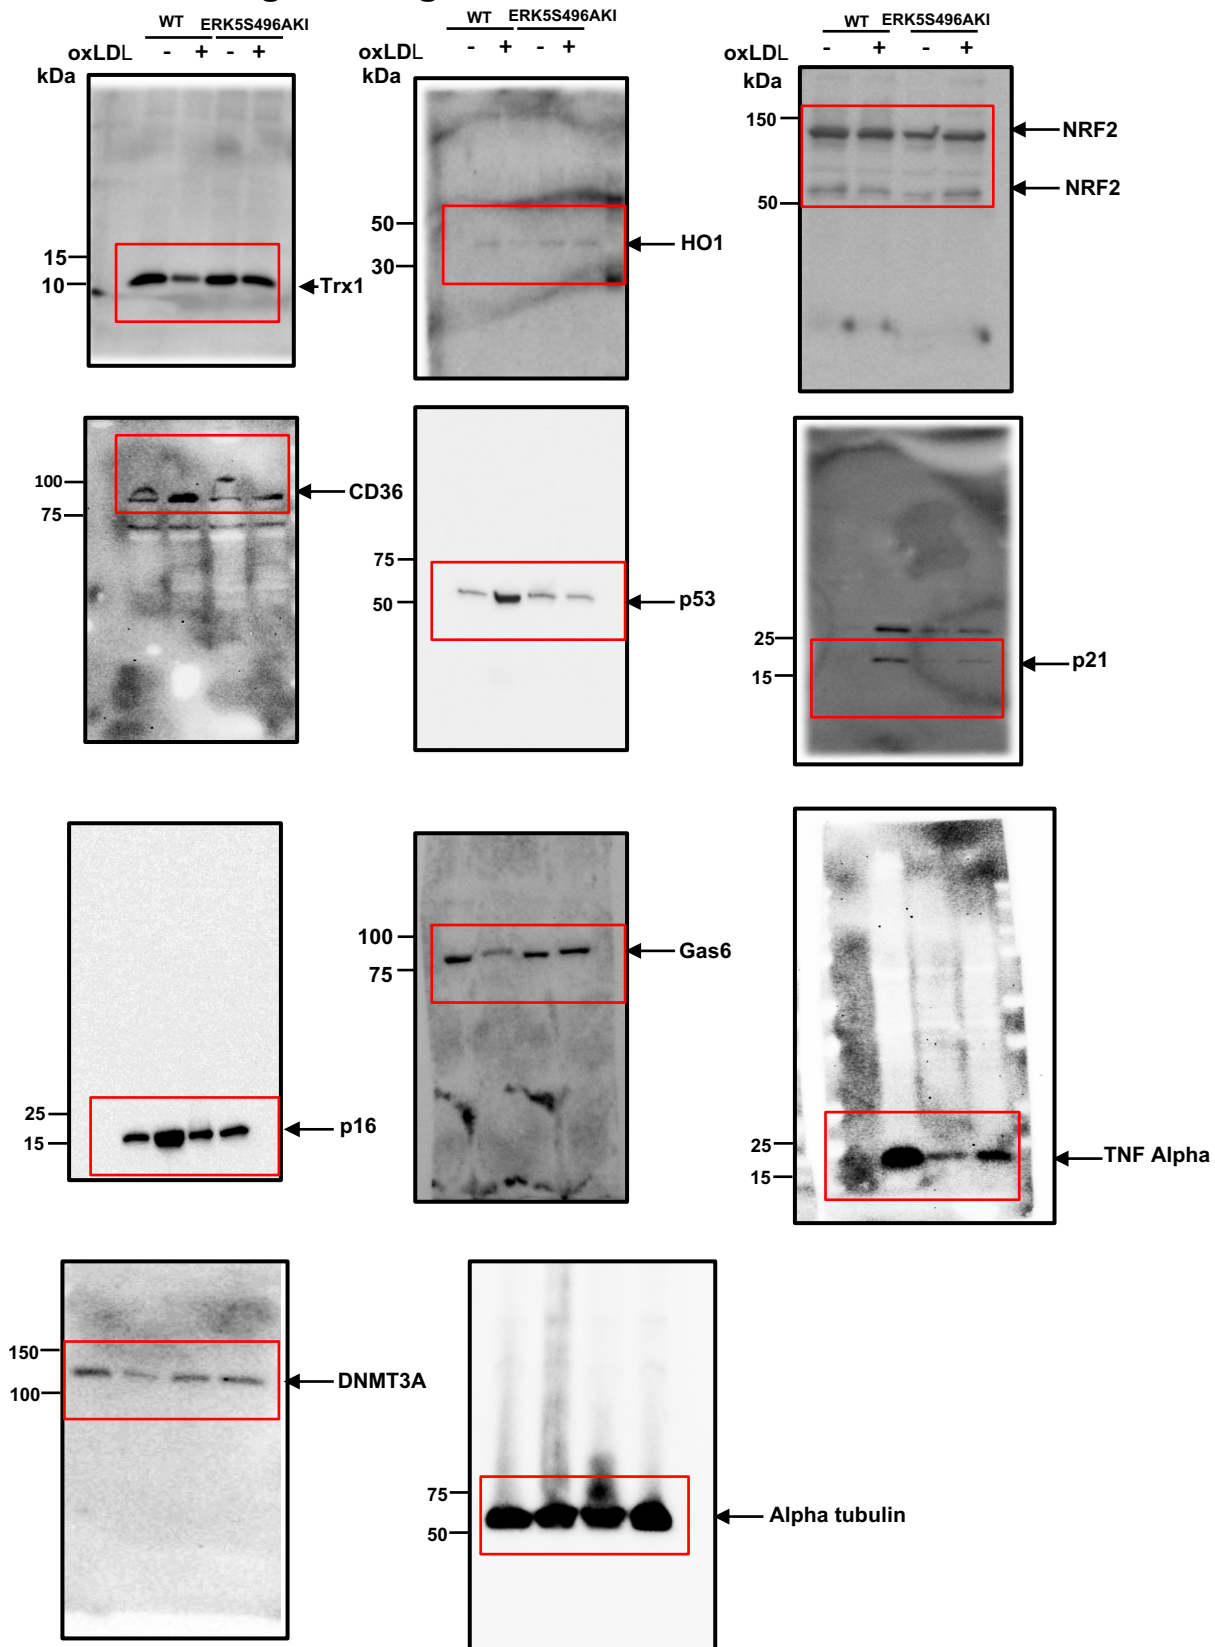



Full unedited gel for Figure 4I

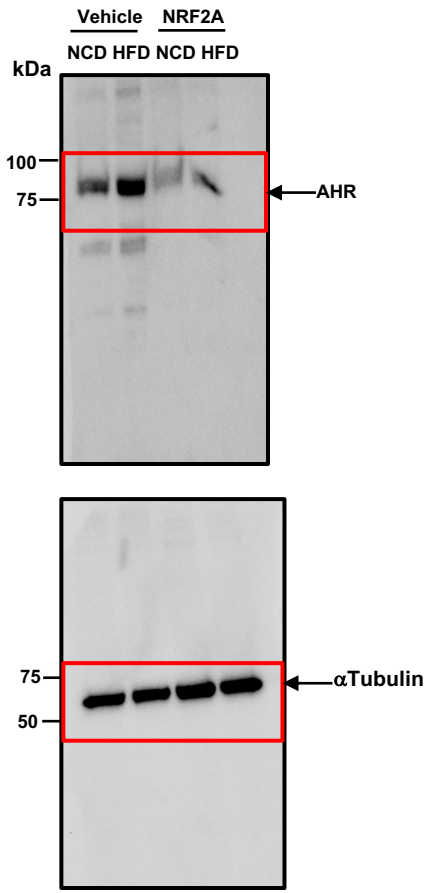

Full unedited gel for Figure 4J

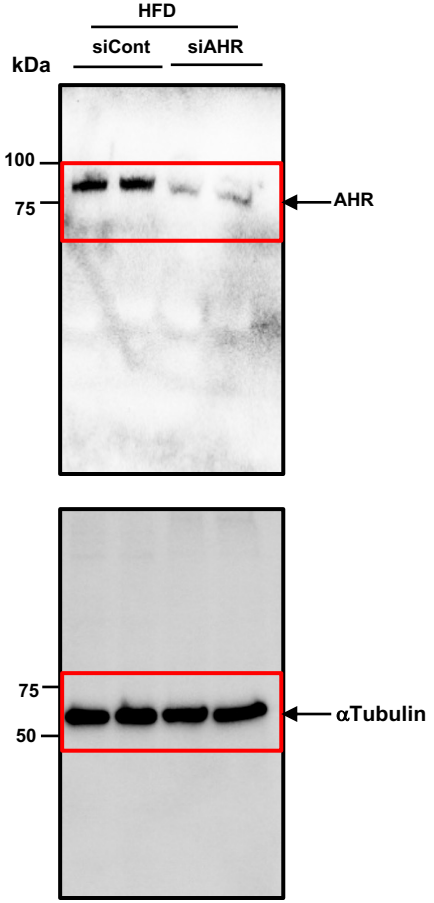

# Full unedited gel for Figure 5B

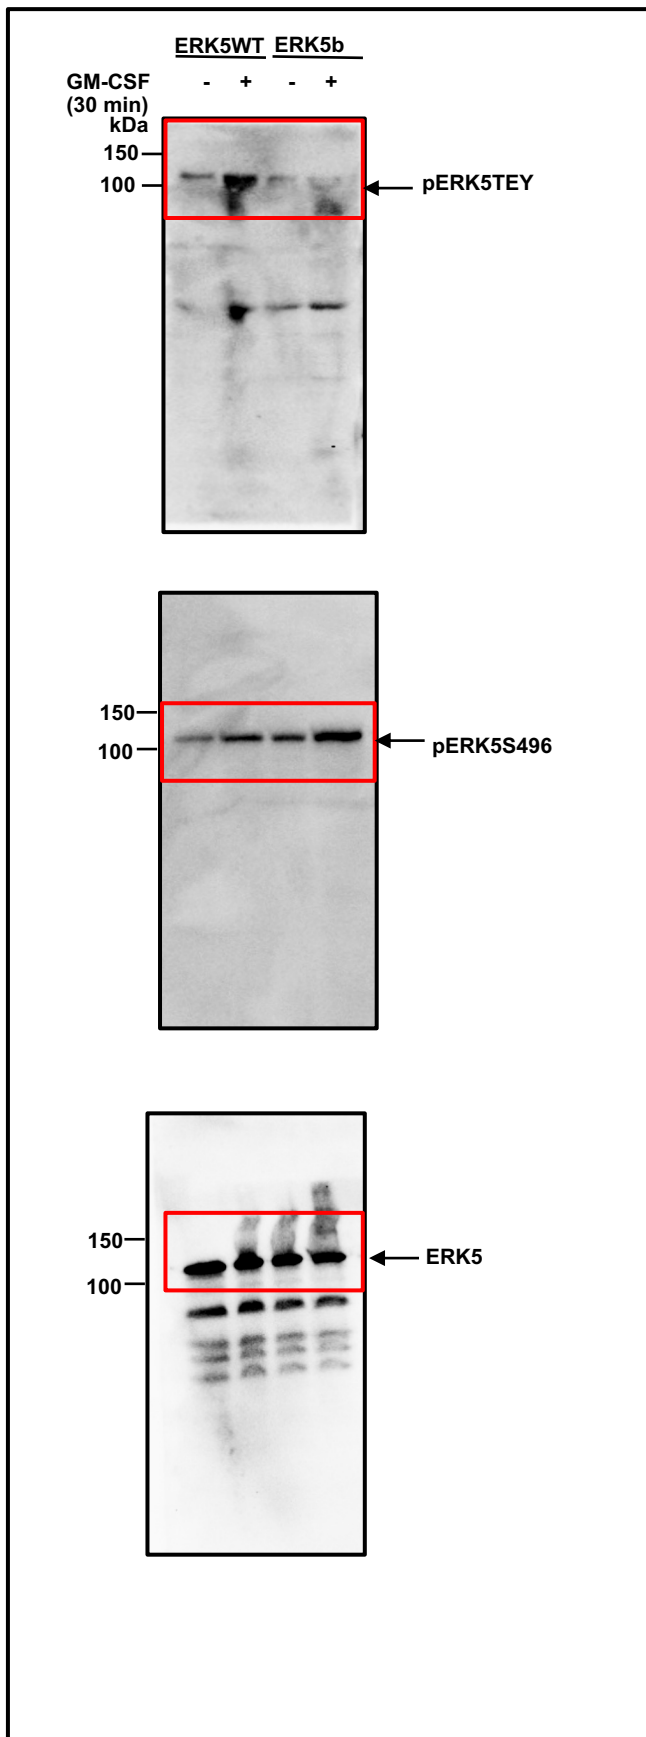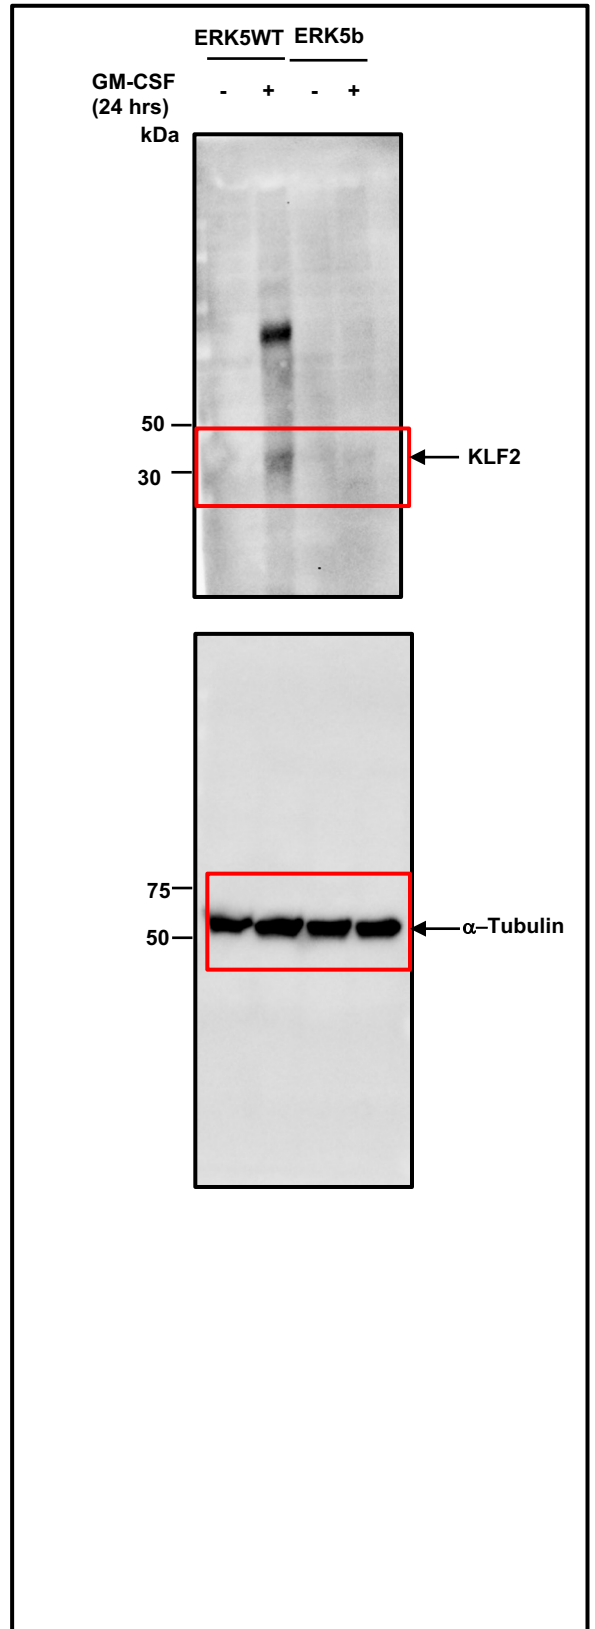

# Full unedited gel for Figure 5C

ERK5WT ERK5TEYm  
GM-CSF (30 min) - + - +  
kDa 150 100

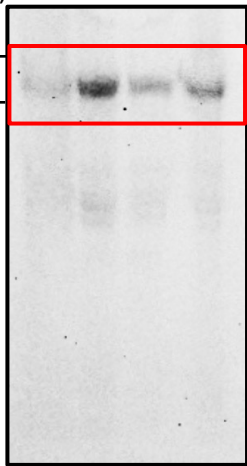

p-ERK5 TEY

150 100 p-ERK5 S496

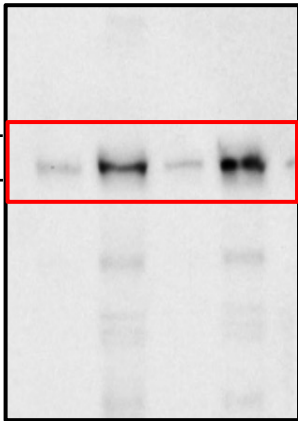

150 100 Total ERK5

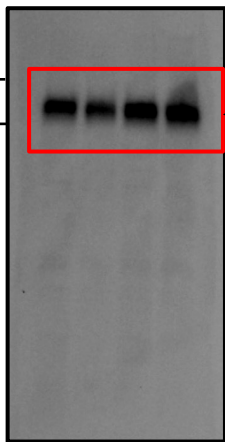

ERK5WT ERK5TEYm  
GM-CSF (24 hrs) - + - +  
kDa

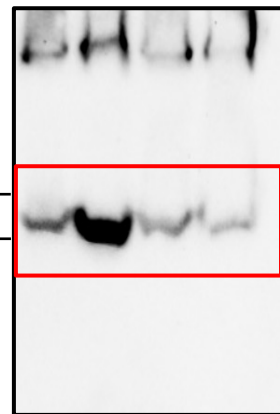

KLF2

75 50  $\alpha$ -Tubulin

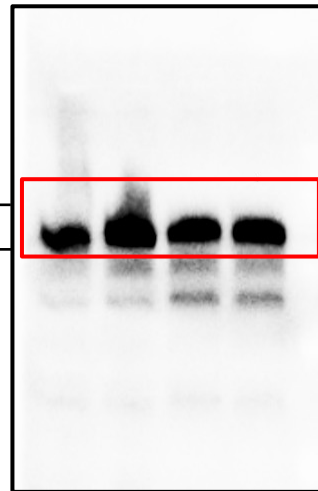

# Full unedited gel for Figure 5D

Veh      AX15836  
GM-CSF (30 min)    -    +    -    +

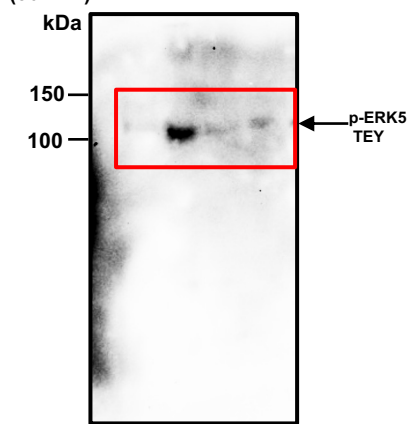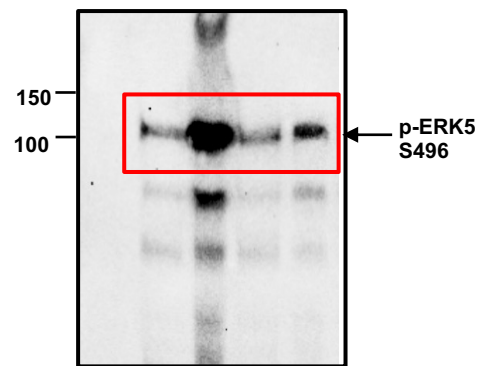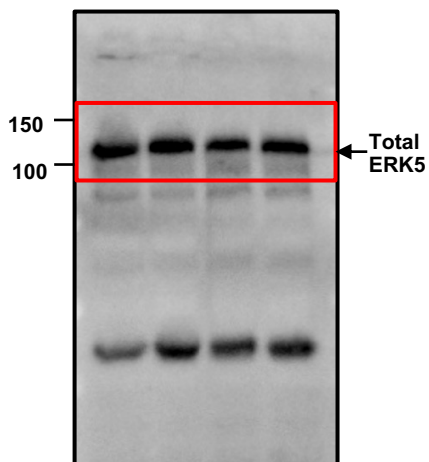

Veh      AX15836  
GM-CSF (24 hrs)    -    +    -    +

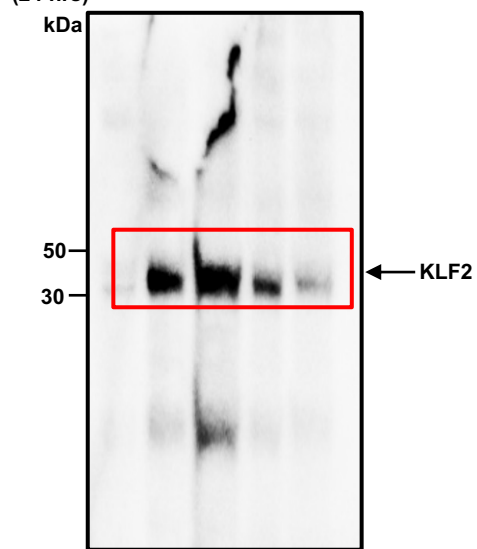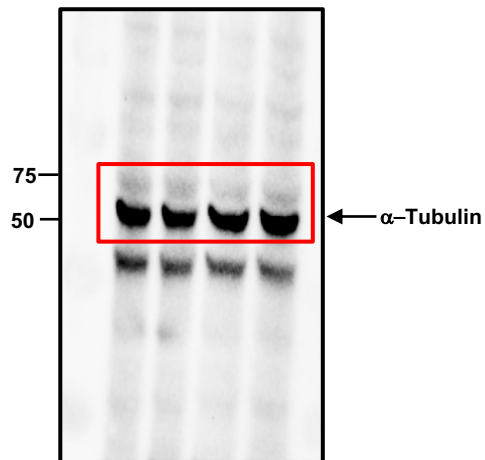



# Full unedited gel for Figure 5E

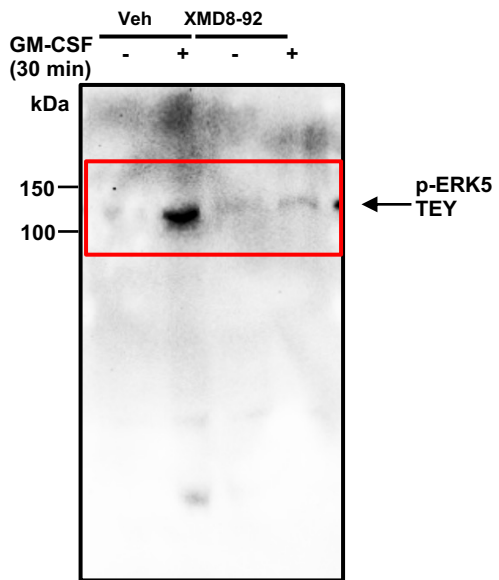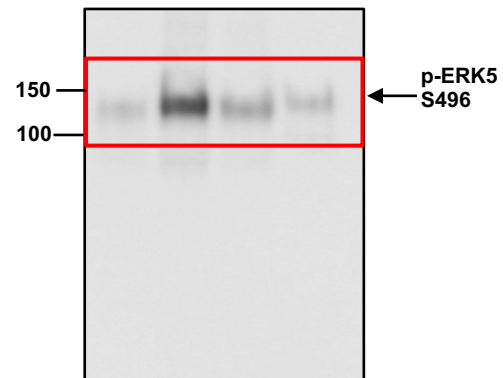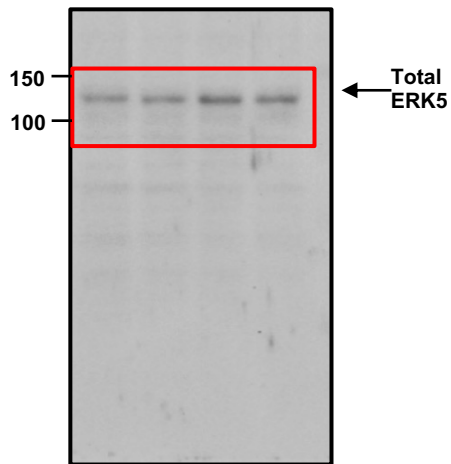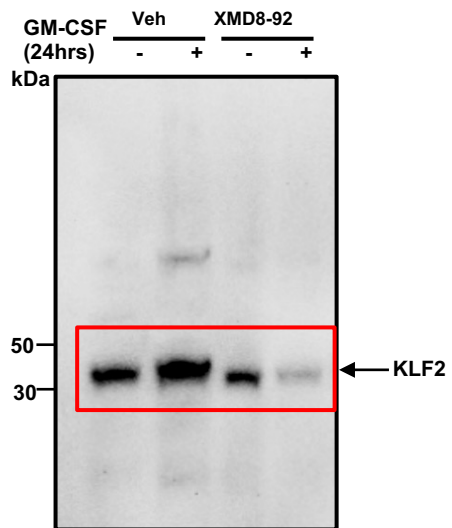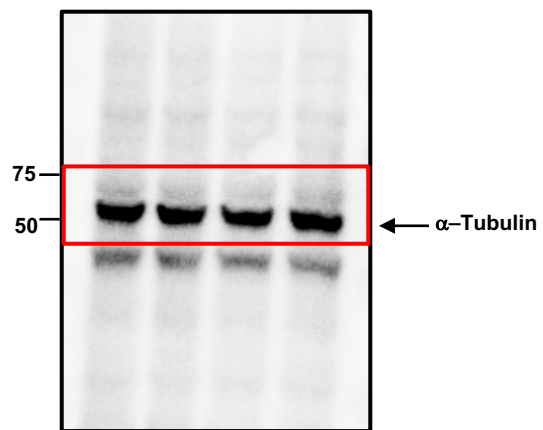

# Full unedited gel for Figure 5F

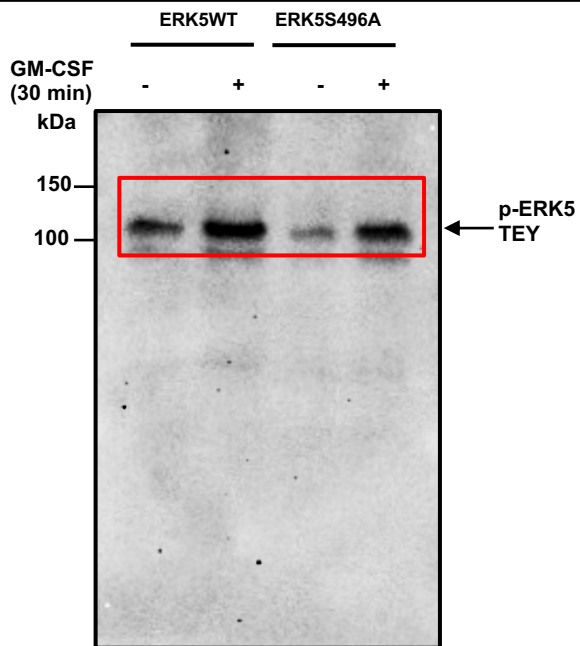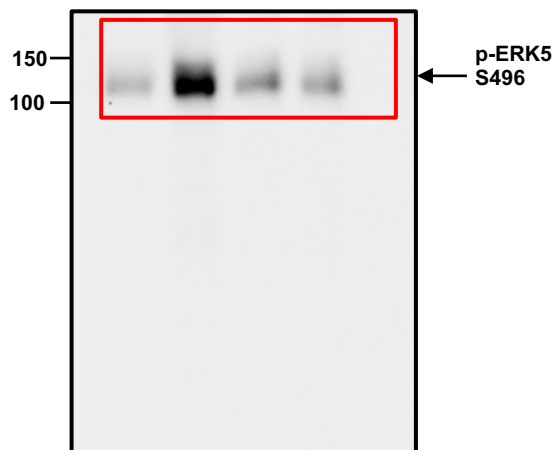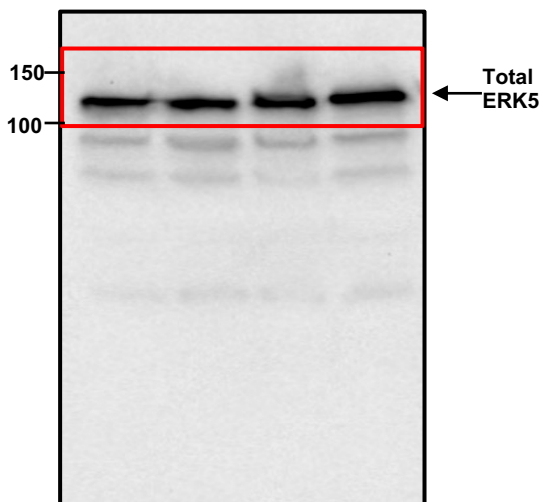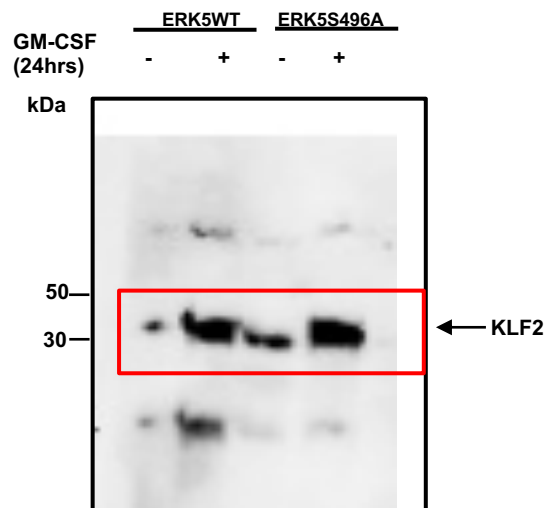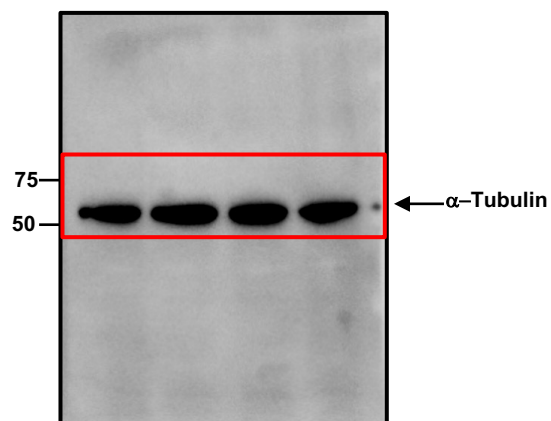

# Full unedited gel for Figure 5G

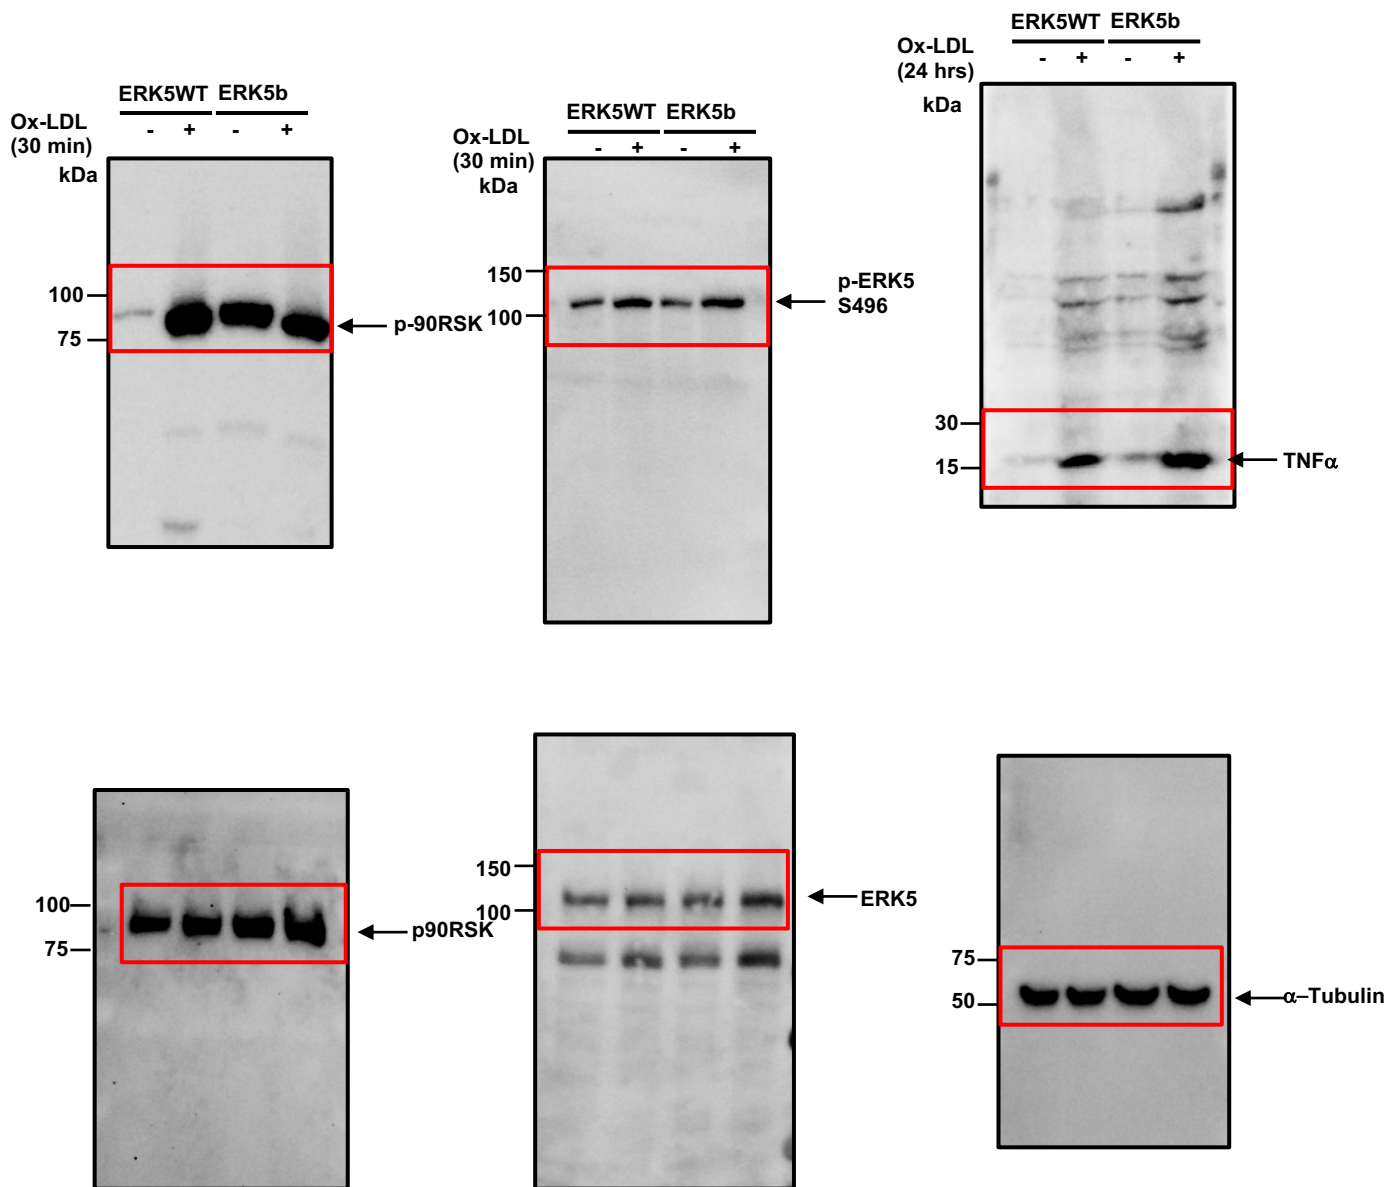

# Full unedited gel for Figure 5H

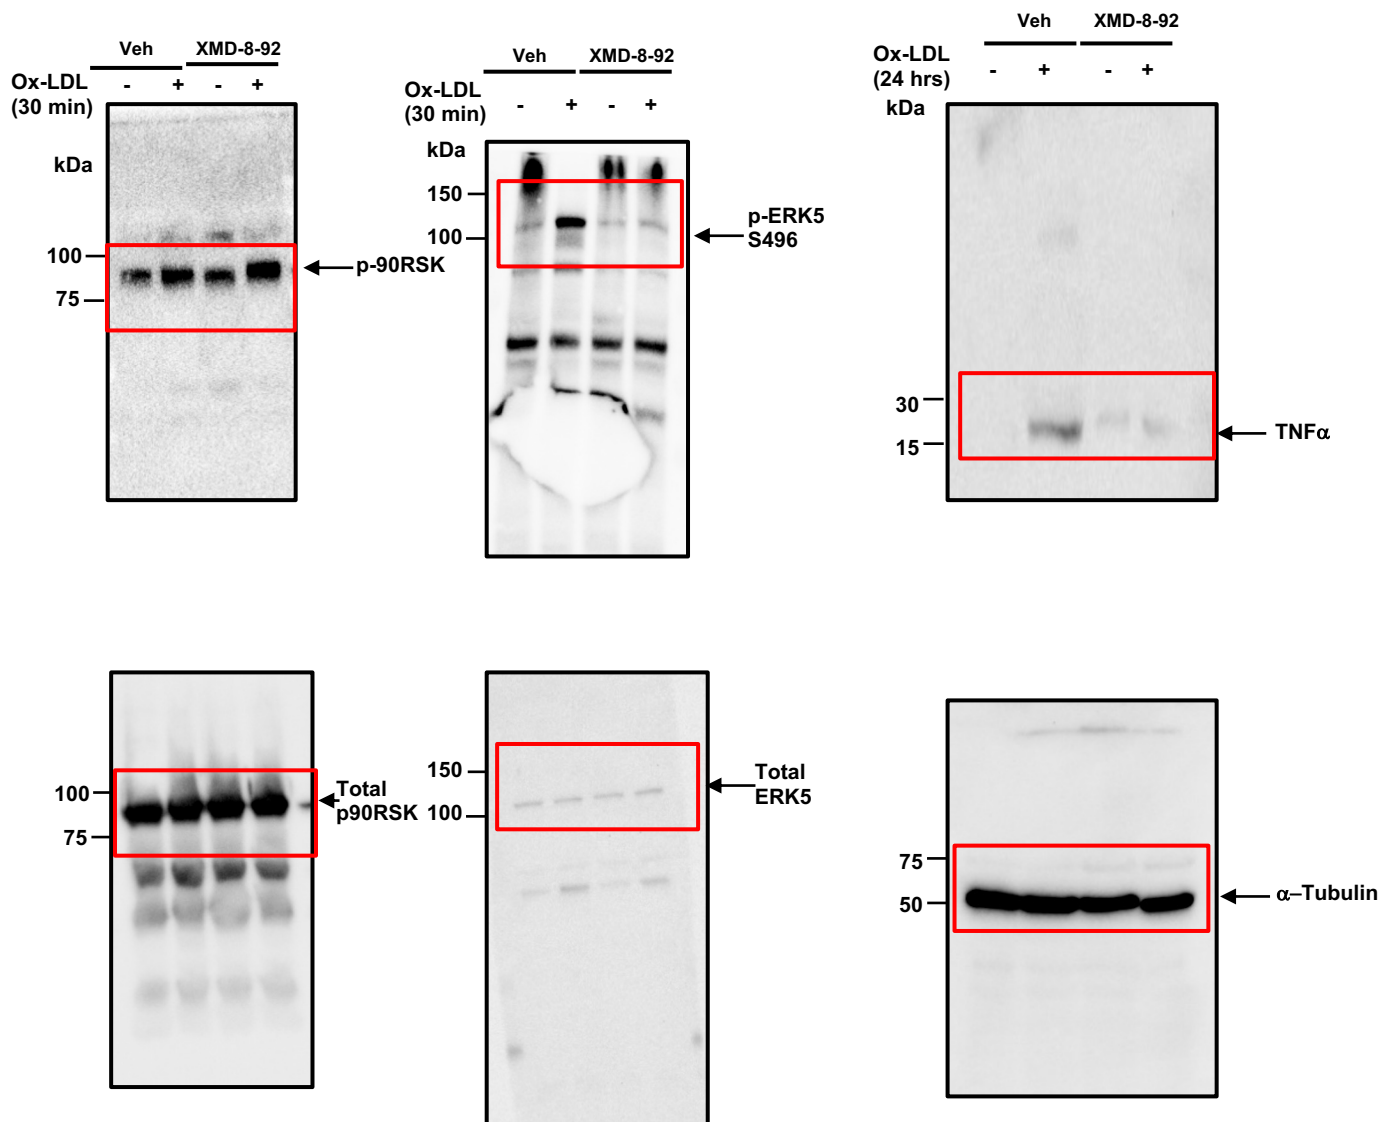

# Full unedited gel for Figure 5I

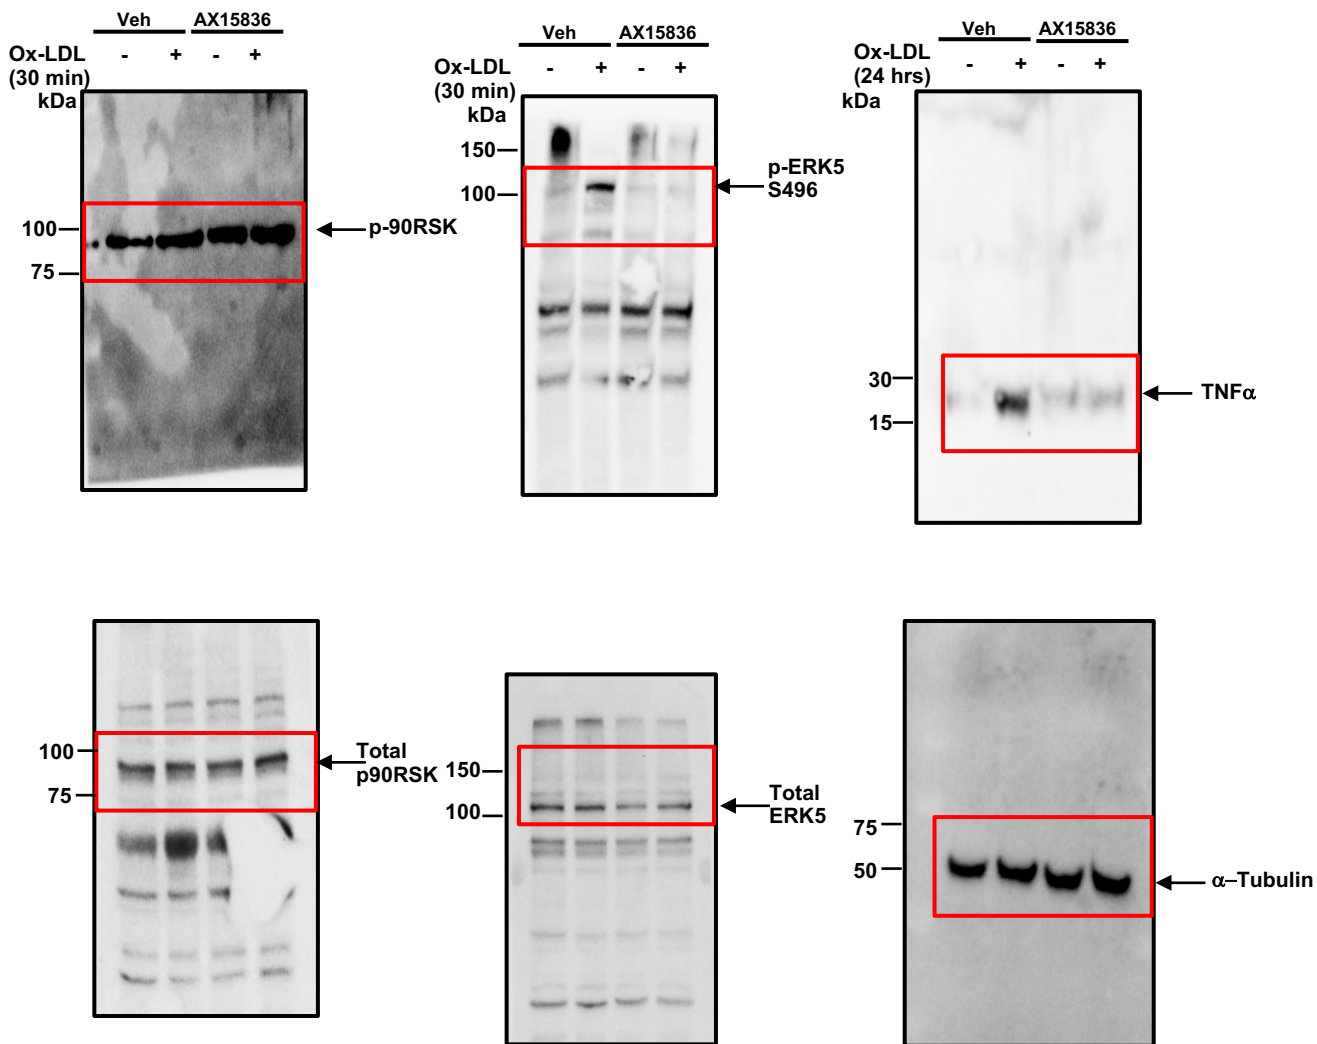

# Full unedited gel for Figure 5J

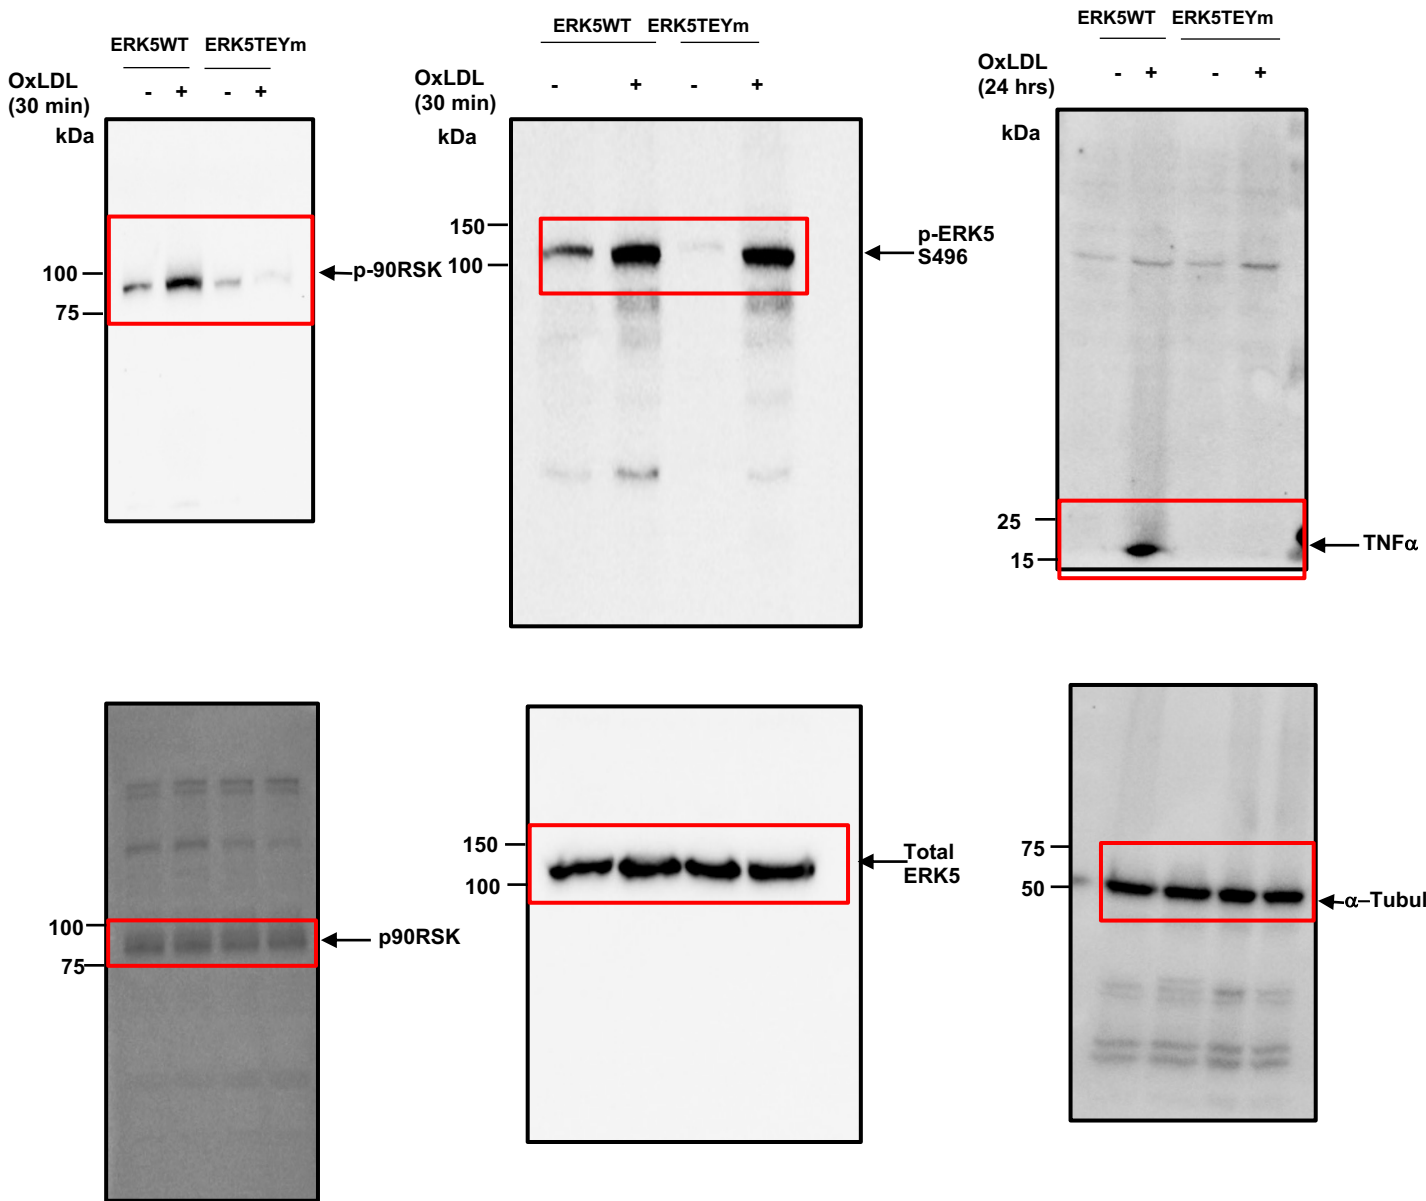

# Full unedited gel for Figure 6C

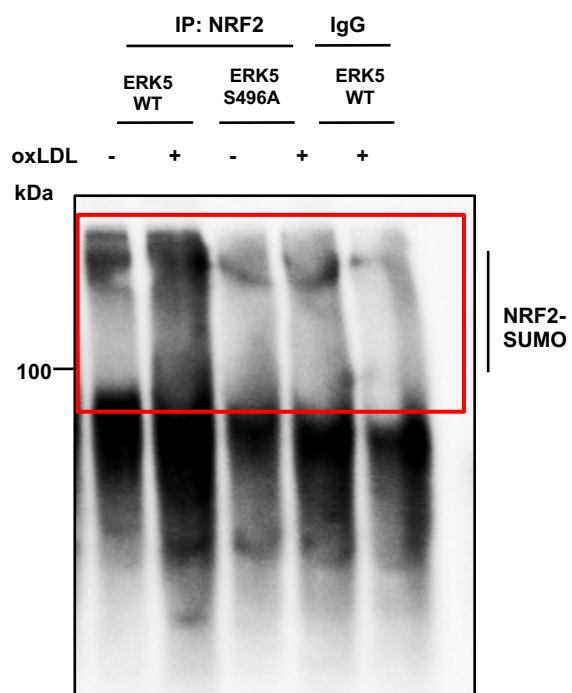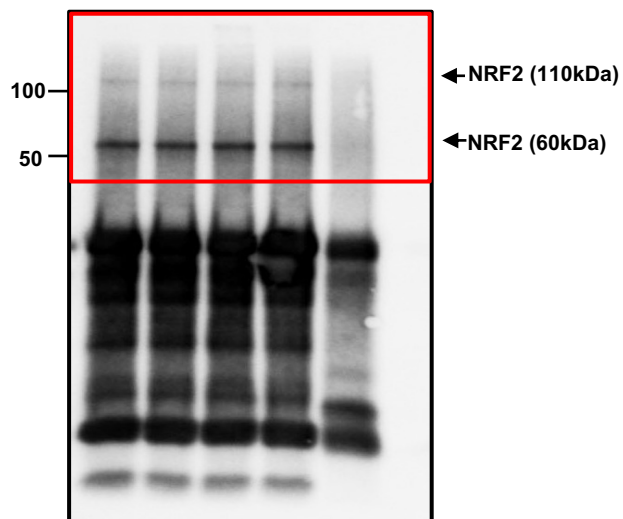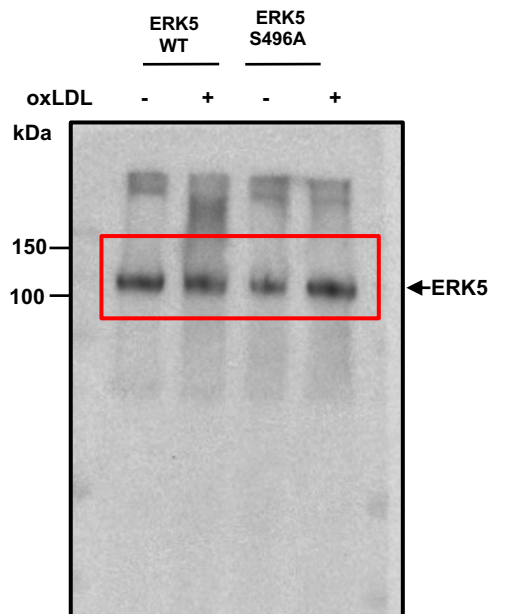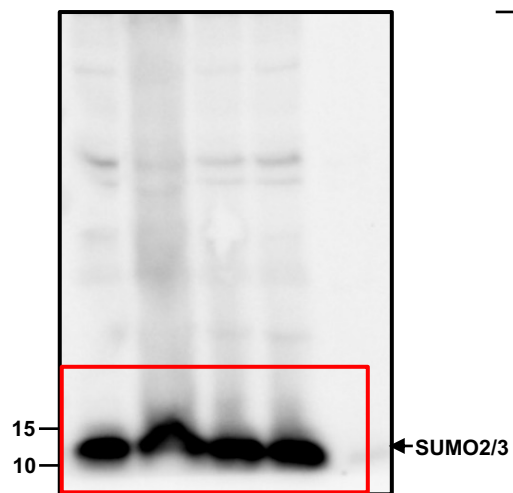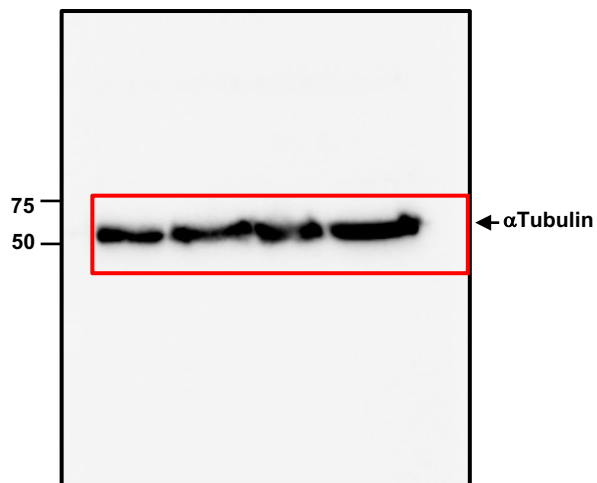

# Full unedited gel for Figure 6D

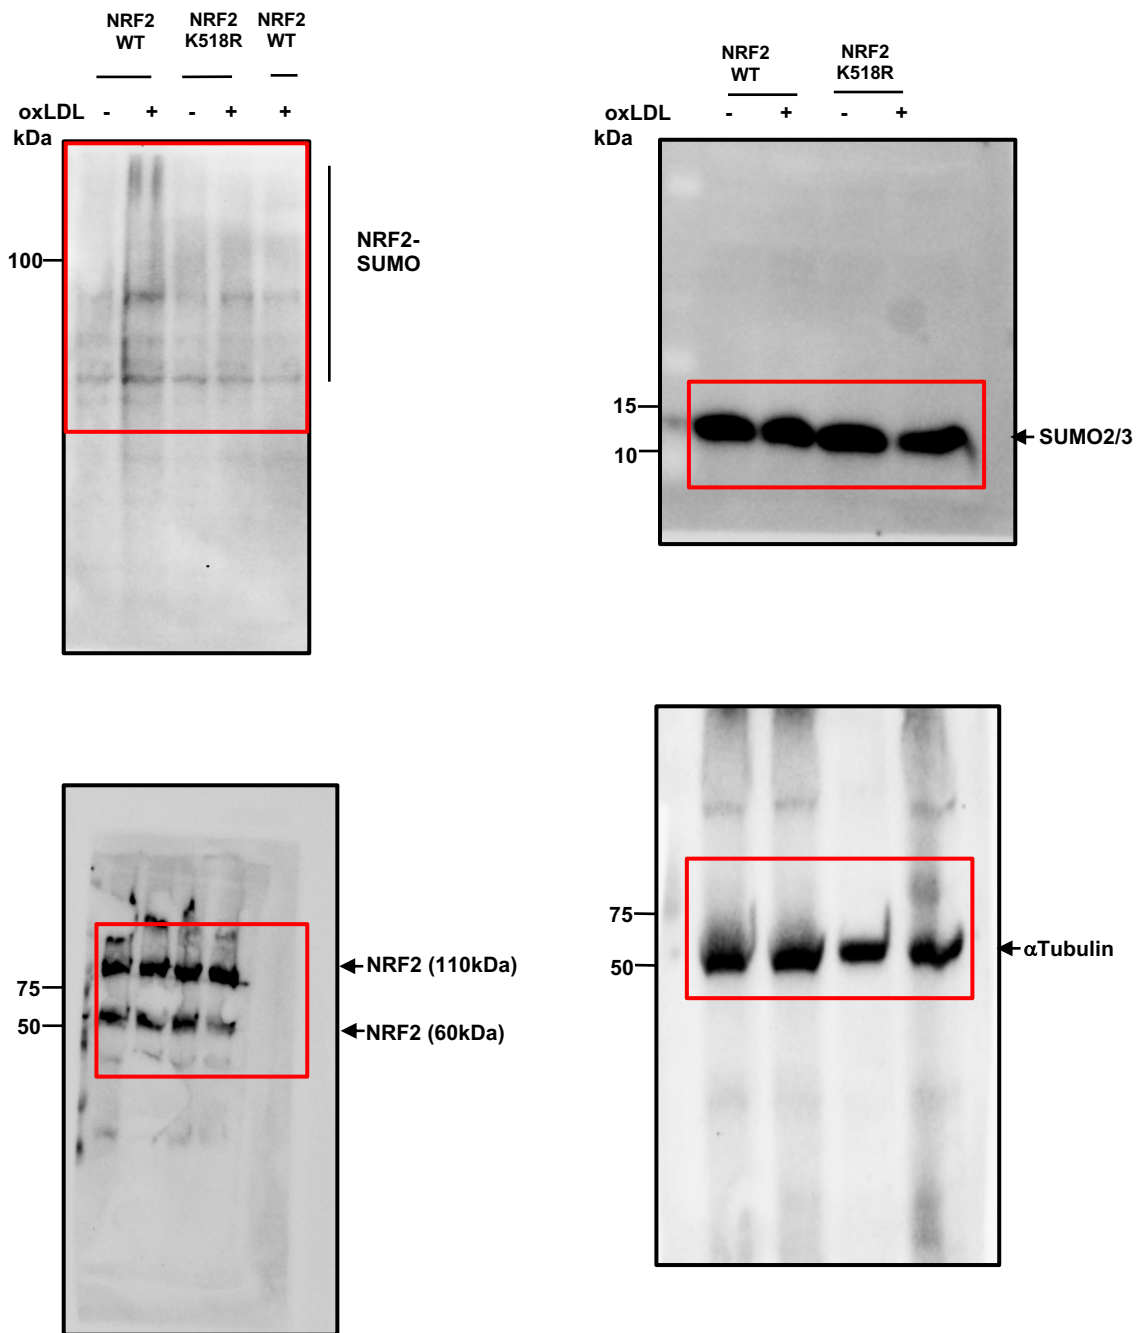



# Full unedited gel for Figure 6J

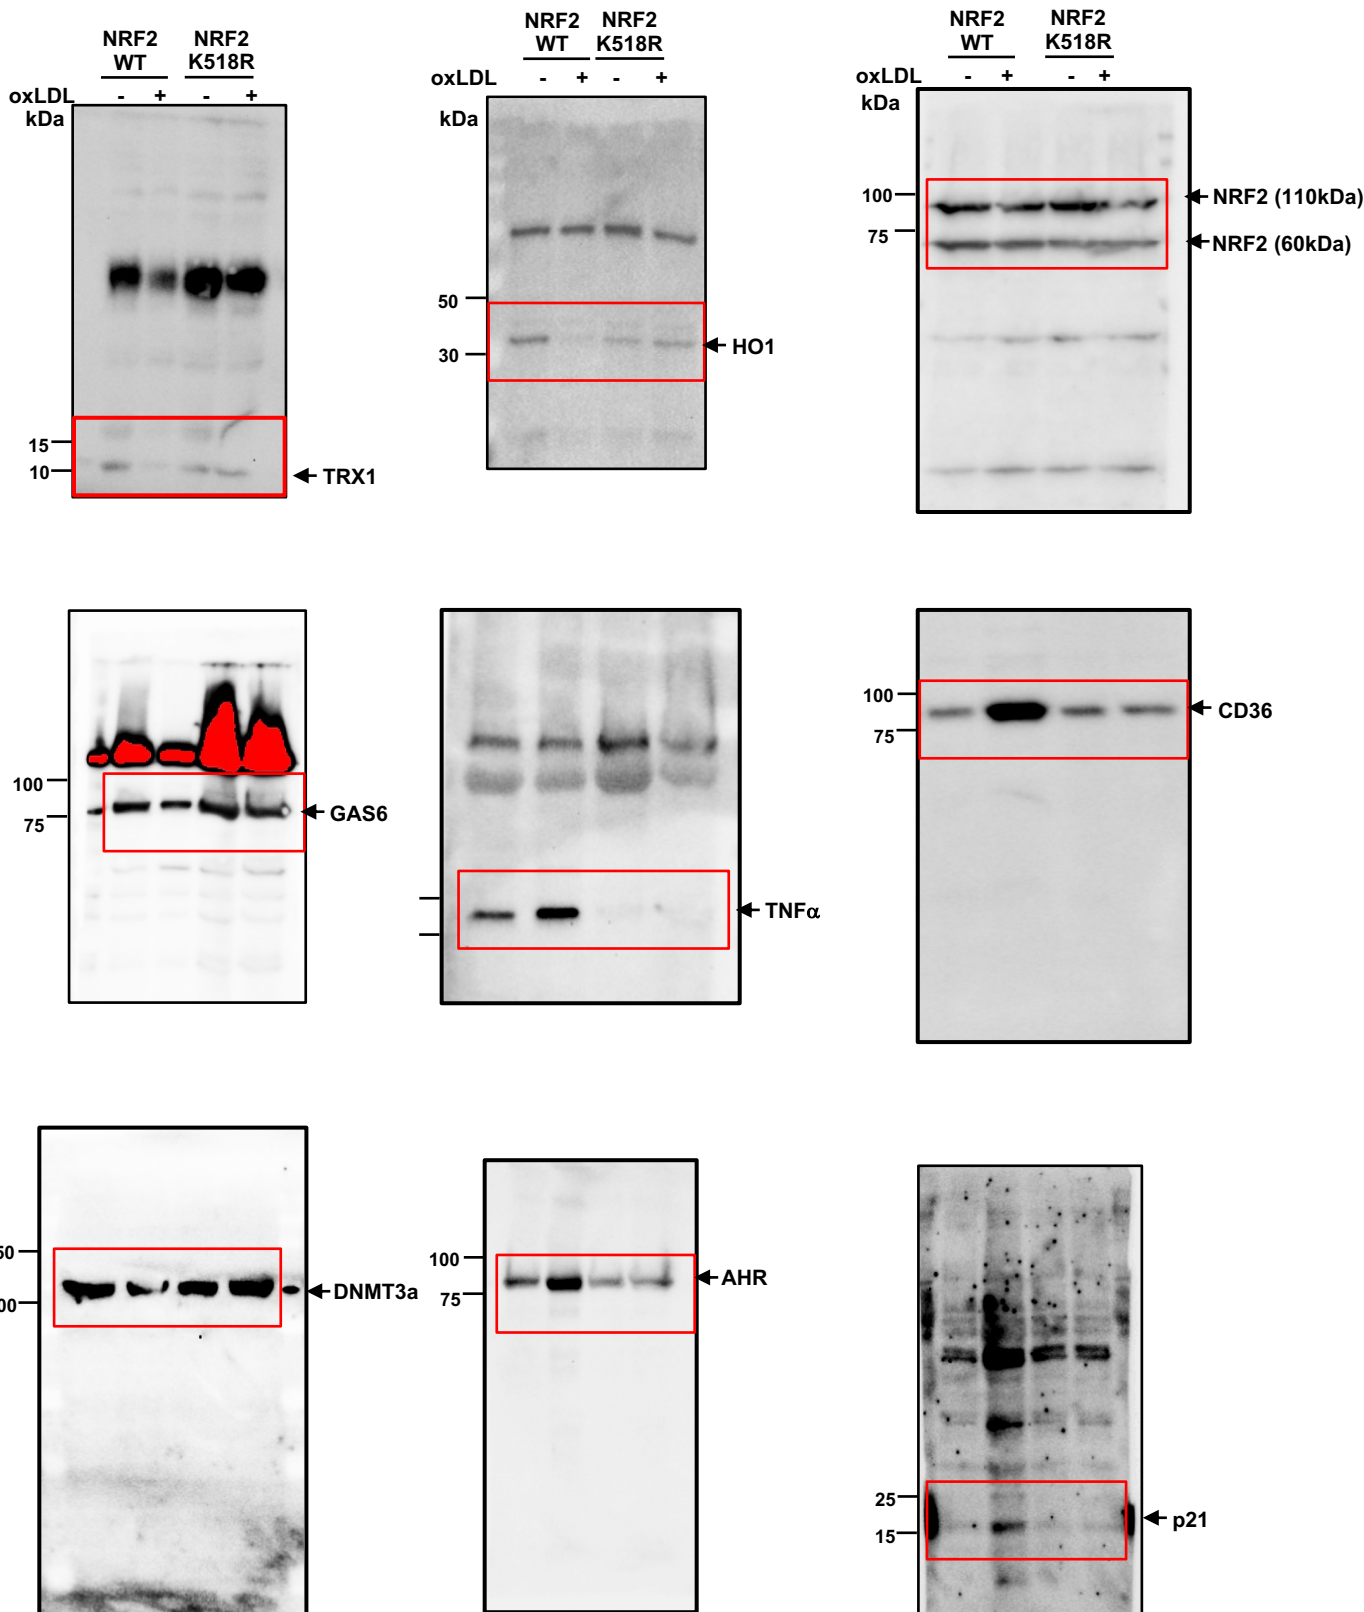

# Full unedited gel for Figure 6J

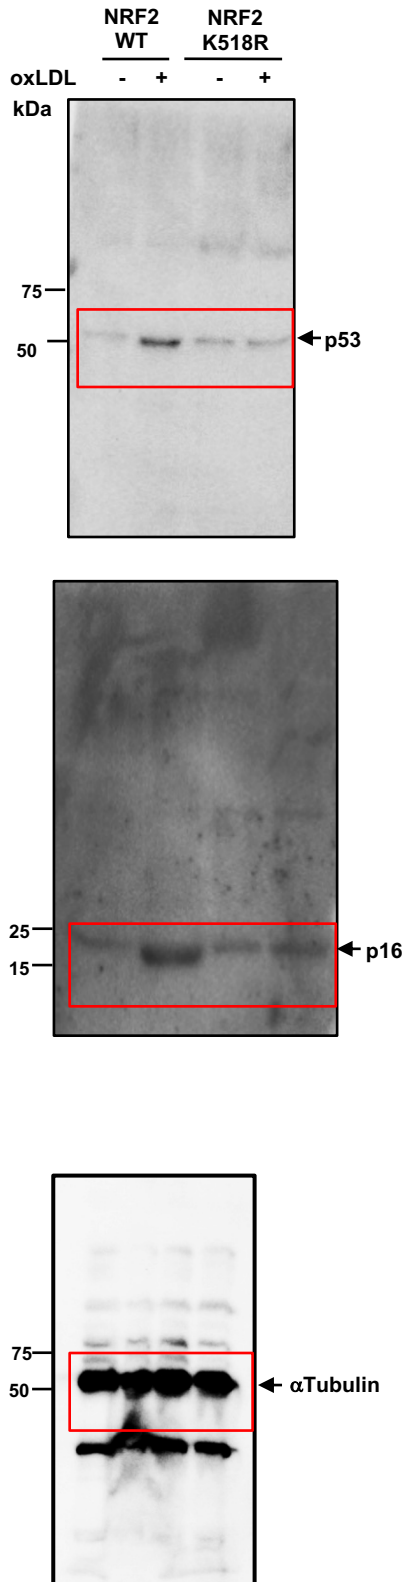

# Full unedited gel for supplemental Figure S1A

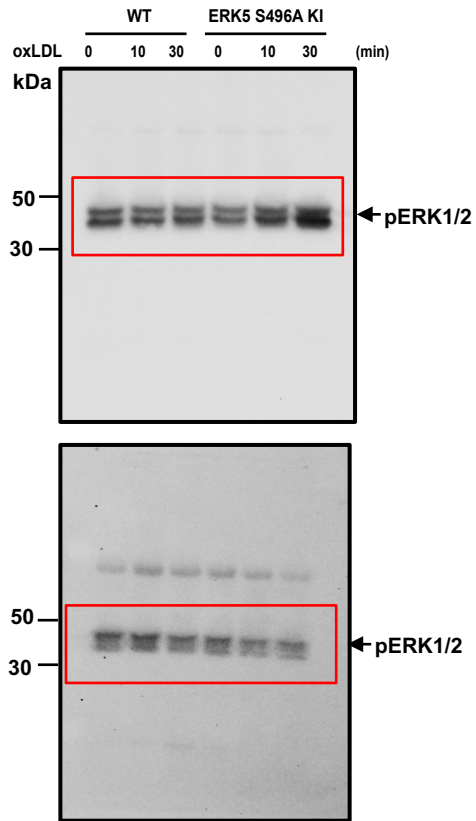

# Full unedited gel for Figure S 8A

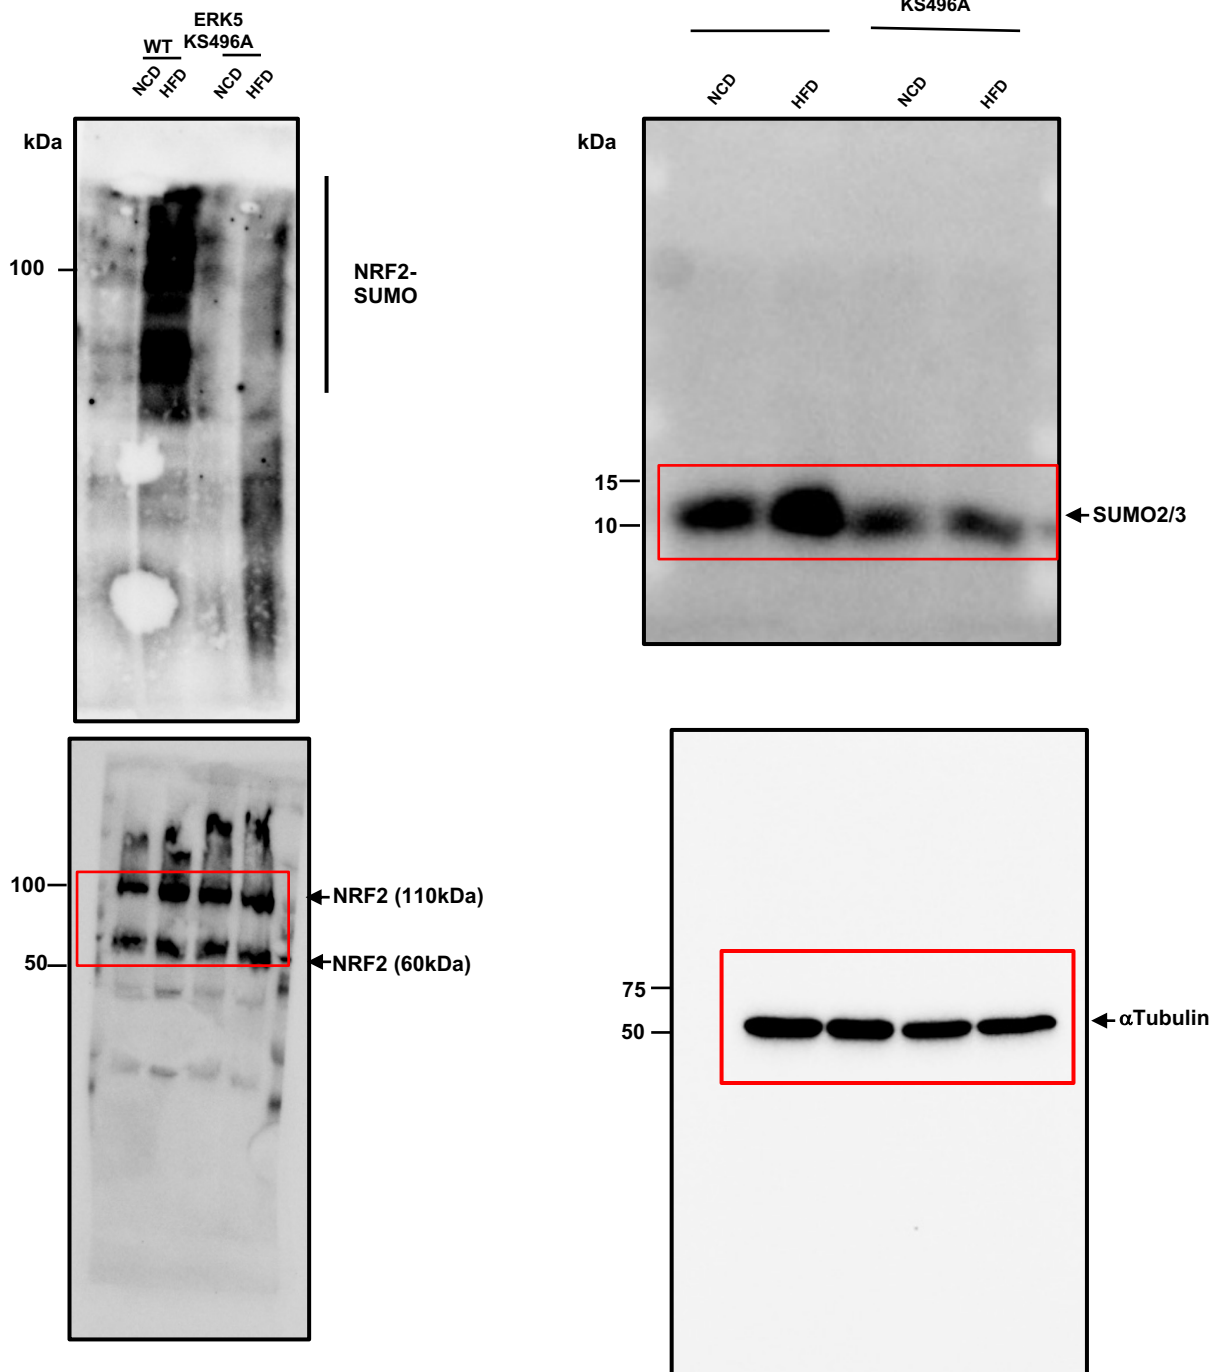

Supplement: NIHMS1902642-supplement-322017_Uncut_Gel_Blots.pdf [file NIHMS1902642-supplement-322017_Uncut_Gel_Blots.pdf]
