# Supplementary material
Source: PubMed Central journal article supplement (PMC10357365)
Supplement: NIHMS1902642-supplement-322017_Major_Resources_Table.pdf [file NIHMS1902642-supplement-322017_Major_Resources_Table.pdf]

## Major Resources Table

In order to allow validation and replication of experiments, all essential research materials listed in the Methods should be included in the Major Resources Table below. Authors are encouraged to use public repositories for protocols, data, code, and other materials and provide persistent identifiers and/or links to repositories when available. Authors may add or delete rows as needed.

### Animals (in vivo studies)

| Species | Vendor or Source       | Background Strain | Sex         | Persistent ID / URL                                                               |
|---------|------------------------|-------------------|-------------|-----------------------------------------------------------------------------------|
| Mouse   | The Jackson Laboratory | C57BL/6J          | Male/Female | <a href="https://www.jax.org/strain/000664">https://www.jax.org/strain/000664</a> |

### Genetically Modified Animals

|                             | Species | Vendor or Source        | Background Strain | Other Information                          | Persistent ID / URL |
|-----------------------------|---------|-------------------------|-------------------|--------------------------------------------|---------------------|
| <b>Parent – Male/Female</b> | Mouse   | UT MD Anderson, Abe lab | C57BL/6J          | ERK5S496A mutation knock in mouse, S496Aki |                     |

### Antibodies

| Target antigen   | Vendor or Source  | Catalog #    | Working concentration (Western blots) | Lot # (preferred but not required) | Persistent ID / URL |
|------------------|-------------------|--------------|---------------------------------------|------------------------------------|---------------------|
| Phospho p90RSK   | Cell signaling    | 9341         | 1:1000                                |                                    | RRID: ab_330753     |
| Total RSK        | R&D Biotech       | MAB 2056     | 1:2000                                |                                    | N/A                 |
| Phospho ERK5S496 | Biorbyt           | Orb5183      | 1:1000                                |                                    | RRID:AB_10934187    |
| PhosphoERK5TEY   | Cell signaling    | 3371         | 1:1000                                |                                    | RRID:AB_2140424     |
| Total ERK5       | Cell signaling    | 3372         | 1:1000                                |                                    | RRID:AB_330491      |
| Thioredoxin 1    | Proteintech       | 14999-1 AP20 | 1:2000                                |                                    | RRID:AB_2272597     |
| HO-1             | abcam             | ab13248      | 1:3000                                |                                    | RRID:AB_2118663     |
| Gas6             | Bioss             | BS-7549R     | 1:1000                                |                                    | N/A                 |
| TNF alpha        | Novus Biologicals | NBP1-19532   | 1:1000                                |                                    | RRID:AB_1643202     |
| CD36             | Cayman chemicals  | 100011       | 1:1000                                |                                    | RRID:AB_327790      |
| AHR              | Invitrogen        | MA1-514      | 1:2000                                |                                    | RRID:AB_2273723     |
| NRF2             | Gentex            | GTX103322    | 1:1000                                |                                    | RRID:AB_1950993     |
| PCNA             | Invitrogen        | 13-3900      | 1:1000                                |                                    | RRID:AB_86593       |
| Lamin b1         | LSBio             | LS-C82208    | 1:1000                                |                                    | RRID:AB_1655944     |
| P53              | Santacruz         | SC-98        | 1:500                                 |                                    | RRID:AB_628085      |

DOI [to be added]

|                                          |                         |            |        |  |                  |
|------------------------------------------|-------------------------|------------|--------|--|------------------|
| P21                                      | Cell signaling          | 2947       | 1:1000 |  | RRID:AB_823586   |
| P16                                      | Proteintech             | 10883-1-AP | 1:1000 |  | N/A              |
| DNMT3a                                   | Novus Biologicals       | NB12013888 | 1:500  |  | RRID:AB_789607   |
| Phospho ERK1/2                           | Cell signaling          | 9101       | 1:1000 |  | RRID:AB_331646   |
| Total ERK1/2                             | Cell signaling          | 9194       | 1:1000 |  | N/A              |
| P53bp1                                   | Novus Biologicals       | NB100-304  | 1:1000 |  | RRID:AB_10003037 |
| KLF2                                     | Novus Biologicals       | NBP261812  | 1:2000 |  | N/A              |
| SUMO2/3                                  | MBL Lifesciences        | M114-3     | 1:2000 |  | RRID:AB_592769   |
| Alpha tubulin                            | Sigma                   | T5168      | 1:4000 |  | RRID:AB_477579   |
| Ki67                                     | abcam                   | Ab15580    | 1:300  |  | RRID:AB_10562976 |
| goat anti-rabbit                         | Thermofisher scientific | A-21038    | 1:5000 |  | RRID:AB_2535709  |
| goat anti-mouse                          | Thermofisher scientific | A-21237    | 1:5000 |  | RRID:AB_2535806  |
| HRP - GAR-                               | Novus Biologicals       | NB7160     | 1:5000 |  | RRID:AB_524669   |
| HRP - GAM-                               | Novus Biologicals       | NB7539     | 1:5000 |  | RRID:AB_10126266 |
| Alexa 488 anti-rabbit secondary antibody | Molecular probes        | A11055     | 1:200  |  | RRID: AB_2534102 |
| Alexa 488 anti-mouse secondary antibody  | Molecular probes        | A11029     | 1:200  |  | RRID: AB_2534088 |
| Alexa 546 anti-mouse secondary antibody  | Molecular probes        | A11081     | 1:200  |  | RRID: AB_141738  |
| F4/80                                    | BD biosciences          | 565410     | 1:100  |  | RRID:AB_10526888 |
| CD11b                                    | BD biosciences          | 553310     | 1:100  |  | RRID:AB_394774   |

| <b>IMC antibodies</b> |                      |             |           |  |                  |
|-----------------------|----------------------|-------------|-----------|--|------------------|
| CD31                  | R&D                  | AF3628      | 10 µg/mL  |  | RRID:AB_2161028  |
| p-Tyrosine            | Fluidigm             | 3144024D    | 10 µg/mL  |  | N/A              |
| CD107b                | Invitrogen           | 14-1072-85  | 20 ug/mL  |  | RRID:AB_657562   |
| TOP2b                 | R&D                  | MAB6348     | 20 ug/mL  |  | RRID:AB_10889629 |
| a-SMA                 | Fluidigm             | 3141017D    | 2.5 µg/mL |  | RRID:AB_2890139  |
| Trx                   | Proteintech          | 14999-1-AP  | 10 ug/mL  |  | RRID:AB_2272597  |
| CD11b                 | Fluidigm             | 3149028D    | 5 µg/mL   |  | RRID:AB_2891189  |
| p-PKCzeta-T410        | Abclonal             | AP0520      | 30 ug/mL  |  | RRID:AB_2771419  |
| p-TERF2IP-S205        | (Home made)          |             | 30 ug/mL  |  | N/A              |
| p-AMPK alpha (Thr172) | Affinity Biosciences | AF3423      | 10 ug/mL  |  | RRID:AB_2834865  |
| CCR7                  | Biorbyt              | orb547290   | 10 ug/mL  |  | N/A              |
| Tyro3                 | R&D                  | MAB759      | 30 ug/mL  |  | RRID:AB_2210988  |
| Gas6                  | Abclonal             | A8545       | 20 ug/mL  |  | RRID:AB_2769575  |
| p90RSK1               | StressMarq           | SPC-147F    | 10 ug/mL  |  | RRID:AB_2703590  |
| p-p90RSK (S380)       | Bioworld             | BS4870      | 20 ug/mL  |  | N/A              |
| ERG                   | Biorbyt              | orb192164   | 10 ug/mL  |  | N/A              |
| p16                   | Abcam                | ab54210     | 20 ug/mL  |  | RRID:AB_881819   |
| IL-6                  | R&D                  | AF-406-NA   | 10 ug/mL  |  | RRID:AB_354478   |
| Arginase-1            | Fluidigm             | 3164027D    | 10 µg/mL  |  | RRID:AB_2891145  |
| p53                   | Abcam                | ab131442    | 30 ug/mL  |  | RRID:AB_11155283 |
| vWF                   | Millipore            | AB7356      | 10 ug/mL  |  | RRID:AB_92216    |
| Ki67                  | Fluidigm             | 3168022D    | 10 µg/mL  |  | RRID:AB_2811061  |
| DNMT3a                | Novus                | NB120-13888 | 10 ug/mL  |  | RRID:AB_2261802  |
| p-ERK                 | Fluidigm             | 3171021D    | 10 µg/mL  |  | RRID:AB_2927686  |
| p-JAK2                | AbCam                | ab219728    | 30 ug/mL  |  | N/A              |
| YAP                   | Abcam                | ab56701     | 10 ug/mL  |  | RRID:AB_2219140  |

|                      |                |             |          |  |                  |
|----------------------|----------------|-------------|----------|--|------------------|
| p-YAP (Y357)         | Abcam          | ab62751     | 10 ug/mL |  | RRID:AB_956486   |
| <b>IF antibodies</b> |                |             |          |  |                  |
| p53                  | abcam          | ab131442    | 1:50     |  | RRID:AB_11155283 |
| TRX                  | Proteintech    | 14999-1-AP  | 1:40     |  | RRID:AB_2272597  |
| DNMT3a               | Novus          | NB120-13888 | 1:25     |  | RRID:AB_2261802  |
| Mac3                 | BD Biosciences | 550292      | 1:150    |  | RRID:AB_393587   |

### DNA/cDNA Clones

| Clone Name        | Sequence                        | Source / Repository                                       | Persistent ID / URL |
|-------------------|---------------------------------|-----------------------------------------------------------|---------------------|
| ERK5b             | Gene ID: AA288345               | Yan et al., J Biol Chem.276(140):10870-8. (2001)          | N/A                 |
| ERK5TEY mutant    | Gene ID: AA288345               | This paper                                                |                     |
| ERK5S496A         | Gene ID: AA288345               | Le et al., Circ Res110(4):536-50 (2012).                  | N/A                 |
| CA-MEK5           |                                 | Cameron et al., J Biol Chem. 278 (20):18682-18688 (2003). | N/A                 |
| ERK5WT            | Gene ID: AA288345               | Le et al., Circ Res110(4):536-50 (2012).                  | N/A                 |
| pNF-kB Luc        | Gene ID: JQ513377               | Stratagene                                                | N/A                 |
| NRF2WT            | Gene ID: NM_001313902.1         | GeneCopoeia                                               | EX-I4333-M29        |
| NRF2K518R         | Gen ID: NM_001313902.1Lys518Arg | GeneCopoeia                                               | CS-14333-M29-01     |
| pAAV/D377Y-mPCSK9 | Gene ID: 100102                 | Add gene                                                  | RRID_58736          |
| pRL-TK            | Gene ID: AF025846               | Promega                                                   | RRID_11313          |
| Gal4-ERK5         |                                 | Nigro et al., 116(11):1971-1979                           | N/A                 |

### Cultured Cells

| Name                            | Vendor or Source | Sex (F, M, or unknown) | Persistent ID / URL |
|---------------------------------|------------------|------------------------|---------------------|
| Bone marrow derived macrophages | In house         | Male/female            | N/A                 |
| L929 Cells                      | ATCC             | Unknown                | RRID: CVCL_0462     |

### Data & Code Availability

DOI [to be added]

| Description  | Source / Repository | Persistent ID / URL |
|--------------|---------------------|---------------------|
| RNA seq data | NCBI Ominibus       | GSE210949           |

### Other

| Description                                              | Source / Repository                                                     | Persistent ID / URL |
|----------------------------------------------------------|-------------------------------------------------------------------------|---------------------|
| <b>Protein&amp;Lipids</b>                                |                                                                         |                     |
| GM-CSF                                                   | R&D Biosciences                                                         | 415-ML-020          |
| Ox-LDL                                                   | Dr. Henry J. Pownall<br>Lab, Houston<br>Methodist Research<br>INstitute |                     |
| <b>Kits</b>                                              |                                                                         |                     |
| Mito SOX                                                 | Invitrogen                                                              | M36008              |
| ARE Reporter kit                                         | BPS Biosciences                                                         | 60514               |
| Efferocytosis kit                                        | Essen Biosciences                                                       | 4649                |
| Agilent Seahorse XF cell Mito stress kit                 | Agilent Technologies                                                    | 103015-100          |
| Seahorse XF Glycolysis stress kit                        | Agilent Technologies                                                    | 103020-100          |
| ATP kit                                                  | abcam                                                                   | ab83355             |
| NAD kit                                                  | Promega                                                                 | G9071               |
| Dual Luciferase reporter assay system                    | Promega                                                                 | E1910               |
| iScript cDNA synthesis kit                               | Bio-rad                                                                 | 1708891             |
| iQSYBR Green Super mix                                   | Bio-rad                                                                 | 170-8884            |
| ApoTag peroxidase <i>in situ</i> apoptosis detection kit | Millipore                                                               | S7100               |
| Cholesterol assay kit                                    | Bioassay systems                                                        | EHDL-100            |
| Mouse Inflammatory array kit                             | Ray Biotech, Inc                                                        | AAM-INF-1-4         |
| HE staining kit                                          |                                                                         |                     |
| <b>Drug and Reagent</b>                                  |                                                                         |                     |
| XMD8-92                                                  | Selleck chemicals                                                       | S7525               |
| FMK-MEA                                                  | MCE                                                                     | HY-52101C           |
| NRF2 Activator                                           | Calbiochem                                                              | 5303510001          |

DOI [to be added]

|                                |                      |                   |
|--------------------------------|----------------------|-------------------|
| AX-15836                       | Tocris               | 5843              |
| Mito-Tempol                    | abcam                | Ab144644          |
| MitoNeoD                       | MedKoo Biosciences   | 563761            |
| IMDM                           | Gibco                | 12440053          |
| Protein A dyna beads           | Invitrogen           | 10001D            |
| Protein G dyna beads           | Invitrogen           | 10003D            |
| Opti-MEM                       | Invitrogen           | 31985062          |
| Laemmli buffer                 | Bio-Rad              | 1610747           |
| NCM membrane                   | Bio-Rad              | 1620115           |
| Lipofectamine 2000             | Invitrogen           | 11668019          |
| <b>Instrument and Software</b> |                      |                   |
| GraphPad prism version 9.0.1   | GraphPad Software    | RRID:SCR_002798   |
| Flowjo™ v10                    | FLOWJO               | RRID:SCR_008520   |
| Incucyte                       | Essen Biosciences    | RRID:SCR_019874   |
| Flow cytometer-Cytoflex        | Beckman coulter      | RRID:SCR_019627   |
| VEVO-2100 System               | Visual sonics        | RRID:SCR_015816   |
| Hyperion imaging system        | Standard Biotools    | SCR_023195        |
| Seahorse XF24 analyzer         | Agilent technologies | RRID:SCR_019539   |
| Fluorometer                    | BMG Lab Tech         | N/A               |
| TD-20/20 Luminometer           | N/A                  | Turner Biosystems |
| Image J                        | NIH                  | RRID:SCR_003070   |
| Cuttdiff                       | N/A                  | RRID:scr_001647   |
| GSEA                           | N/A                  | RRID:SCR_005724   |
| Gene expression omnibus        | N/A                  | RRID:SCR_005012   |
| Tissue processor- leica-TP1020 | Leica                | N/A               |



## ARRIVE GUIDELINES

The ARRIVE guidelines (<https://arriveguidelines.org/>) are a checklist of recommendations to improve the reporting of research involving animals. Key elements of the study design should be included below to better enable readers to scrutinize the research adequately, evaluate its methodological rigor, and reproduce the methods or findings.

### Study Design

| Groups                              | Sex | Age     | Number (prior to experiment) | Number (after termination) | Littermates (Yes/No) | Other description                                                                                                                                                                                                |
|-------------------------------------|-----|---------|------------------------------|----------------------------|----------------------|------------------------------------------------------------------------------------------------------------------------------------------------------------------------------------------------------------------|
| <b>Fig1A &amp;1SA</b>               |     |         |                              |                            |                      |                                                                                                                                                                                                                  |
| Group 1 (WT)                        | M   | 8 weeks | 6                            | 6                          | No                   | BMDM's were isolated from mice treated with or without oxLDL                                                                                                                                                     |
| Group 2 (ERK5S496A)                 | M   | 8 weeks | 6                            | 6                          | No                   | Same as above                                                                                                                                                                                                    |
| <b>Figure 1C-D &amp; 2S (1) A-E</b> |     |         |                              |                            |                      |                                                                                                                                                                                                                  |
| Group 1 (WT)                        | M   | 8 weeks | 20                           | 15                         | No                   | rAAV8-D377Y-mPCSK9 injected into WT mice; had been fed an adjusted-calorie (high-fat) diet (HFD) for 16 weeks. Five mice were excluded due to the LDL cholesterol level less than 300mg/dL after 16 weeks of HFD |
| Group 2 (ERK5S496A)                 | M   | 8 weeks | 20                           | 20                         | No                   | Same as above                                                                                                                                                                                                    |
| <b>Figure 1E-F &amp;2A-O</b>        |     |         |                              |                            |                      |                                                                                                                                                                                                                  |
| Group 1 (WT)                        | M   | 8 weeks | 10                           | 8                          | No                   | rAAV8-D377Y-mPCSK9 injected into WT mice; had been fed an adjusted-calorie (high-fat) diet (HFD) for 16 weeks. Two mice were excluded due to the LDL cholesterol level less than 300mg/dL after 16 weeks of HFD  |
| Group 2 (ERK5S496A)                 | M   | 8 weeks | 10                           | 10                         | No                   | Same as above                                                                                                                                                                                                    |



|                                                 |   |         |    |    |    |                                                                                                                                           |
|-------------------------------------------------|---|---------|----|----|----|-------------------------------------------------------------------------------------------------------------------------------------------|
| <b>Figure 1I &amp; 7A-F&amp; S2-1 F</b>         |   |         |    |    |    |                                                                                                                                           |
| Group 1 (WT)                                    | M | 8 weeks | 15 | 15 | No | BMDM's were isolated from mice treated with or without oxLDL                                                                              |
| Group 2 (ERK5S496A)                             | M | 8 weeks | 15 | 15 | No | Same as above                                                                                                                             |
| <b>Figure 3F-O&amp; 4A-K &amp; S1H&amp; S8A</b> |   |         |    |    |    |                                                                                                                                           |
| Group 1 (WT)                                    | M | 8 weeks | 20 | 20 | No | rAAV8-D377Y-mPCSK9 injected into WT mice; had been fed a chow diet (CD) for 16 weeks. After that isolated BMDM's                          |
| Group 2 (ERK5S496A)                             | M | 8 weeks | 20 | 20 | No | Same as above                                                                                                                             |
| Group 3 (WT)                                    | M | 8 weeks | 20 | 20 | No | rAAV8-D377Y-mPCSK9 injected into WT mice; had been fed an adjusted-calorie (high-fat) diet (HFD) for 16 weeks. After that isolated BMDM's |
| Group 4 (ERK5S496A)                             | M | 8 weeks | 20 | 20 | No | Same as above                                                                                                                             |
| <b>Figure 5 &amp; S1F,G and I</b>               |   |         |    |    |    |                                                                                                                                           |
| WT                                              | M | 8 weeks | 10 | 10 | No | BMDM's were isolated from mice treated with or without Indicated treatments                                                               |
| <b>Figure 6 &amp; 7 G-L</b>                     |   |         |    |    |    |                                                                                                                                           |
| Group 1 (WT)                                    | M | 8 weeks | 15 | 15 | No | BMDM's were isolated from WT mice. Transfected with NRF2 WT or NRF2K518R                                                                  |
| <b>Figure S1D-E &amp;S3J&amp; S (2) G-K</b>     |   |         |    |    |    |                                                                                                                                           |

|                        |   |            |    |   |    |                                                                                                                                                                                                                                                     |
|------------------------|---|------------|----|---|----|-----------------------------------------------------------------------------------------------------------------------------------------------------------------------------------------------------------------------------------------------------|
| Group 1<br>(WT)        | M | 8<br>weeks | 10 | 7 | No | rAAV8-D377Y-<br>mPCSK9 injected into<br>WT mice; had been<br>fed an adjusted-calorie<br>(high-fat) diet (HFD)<br>for 16 weeks.<br>Three mice were<br>excluded due to the<br>LDL cholesterol level<br>less than 300mg/dL<br>after 16 weeks of<br>HFD |
| Group 2<br>(ERK5S496A) | M | 8<br>weeks | 10 | 7 | No | Same as above                                                                                                                                                                                                                                       |

**Sample Size:** Please explain how the sample size was decided Please provide details of any a *prior* sample size calculation, if done.

Our preliminary studies showed that the coefficient of covariation was about 30%. A sample size of 15 mice in each group was expected to have 90% power to detect an effect size of 1.226-SD at a two-sided significance level of 0.05 using the two-sample t-test. The effect size of 1.226 corresponds to about 36% mean change between the two groups, for example, atherosclerosis lesion size between wild-type and ERK5 S496A KI groups.

#### **Inclusion Criteria**

Wild-type or ERK5 S496A knock-in (C57BL/6 background) mice at the age of 8-10 weeks will be included.

#### **Exclusion Criteria**

In the AAV-PCSK9 injection model, mice with LDL cholesterol levels less than 300mg/dL after 16 weeks of HFD will be excluded.

#### **Randomization**

All animals were randomly assigned to different experimental groups.

#### **Blinding**

All animal experiments were performed and analyzed in a blinded manner. All data were collected and analyzed by more than one observer, unaware of the group assignment or treatment of the mice.
