# Supplementary material
Source: PubMed Central journal article supplement (PMC10357365)
Supplement: NIHMS1902642-supplement-322017_Supplemental_Table_3.pdf [file NIHMS1902642-supplement-322017_Supplemental_Table_3.pdf]

| Figure # (MC data were located at the bottom) | Group                  | Sample size (n)                    | Shapiro-Wilk normality test P value | Shapiro-Wilk normality test Passed | Applied statistical test(s) and results                                                              | P (or Adjusted) Value |
|-----------------------------------------------|------------------------|------------------------------------|-------------------------------------|------------------------------------|------------------------------------------------------------------------------------------------------|-----------------------|
| 1B: p-p90RSK 10 min                           | WT                     | 3 (time course)                    | 0.9899                              | Yes                                | Two-way ANOVA Tukey post hoc multiple comparison test                                                | 0.991                 |
|                                               | ERKS S496A KI          | 3 (time course)                    | 0.3811                              | Yes                                |                                                                                                      |                       |
| 1B: p-p90RSK 30 min                           | WT                     | 3 (time course)                    | 0.5827                              | Yes                                | Two-way ANOVA Tukey post hoc multiple comparison test                                                | 0.938                 |
|                                               | ERKS S496A KI          | 3 (time course)                    | 0.3386                              | Yes                                |                                                                                                      |                       |
| 1B: p-ERKS496 10 min                          | WT                     | 3 (time course)                    | 0.2103                              | No                                 | One-way ANOVA non parametric Kruskal-Wallis test followed by Dunn post hoc multiple comparison tests | 0.7503                |
|                                               | ERKS S496A KI          | 3 (time course)                    | 0.1436                              | Yes                                |                                                                                                      |                       |
| 1B: p-ERKS496 30 min                          | WT                     | 3 (time course)                    | 0.0569                              | Yes                                | Two-way ANOVA Tukey post hoc multiple comparison test                                                | 0.0004                |
|                                               | ERKS S496A KI          | 3 (time course)                    | 0.0561                              | Yes                                |                                                                                                      |                       |
| 1B: p-ERKSTY 10 min                           | WT                     | 3 (time course)                    | 0.842                               | Yes                                | Two-way ANOVA Tukey post hoc multiple comparison test                                                | 0.9977                |
|                                               | ERKS S496A KI          | 3 (time course)                    | 0.1066                              | Yes                                |                                                                                                      |                       |
| 1B: p-ERKSTY 30 min                           | WT                     | 3 (time course)                    | 0.6048                              | Yes                                | Two-way ANOVA Tukey post hoc multiple comparison test                                                | 0.9991                |
|                                               | ERKS S496A KI          | 3 (time course)                    | 0.2476                              | Yes                                |                                                                                                      |                       |
| ID                                            | WT                     | 15                                 | 0.12                                | Yes                                | Unpaired Student's t-test, two-tailed                                                                | 0.0362                |
|                                               | ERKS S496A KI          | 21                                 | 0.6715                              | Yes                                |                                                                                                      |                       |
| IE                                            | WT                     | 10                                 | 0.681                               | Yes                                | Unpaired Student's t-test, two-tailed                                                                | 0.0444                |
|                                               | ERKS S496A KI          | 10                                 | 0.3932                              | Yes                                |                                                                                                      |                       |
| IF                                            | WT                     | 8                                  | 0.6041                              | Yes                                | Unpaired Student's t-test, two-tailed                                                                | 0.0079                |
|                                               | ERKS S496A KI          | 8                                  | 0.1271                              | Yes                                |                                                                                                      |                       |
| 1G: Vehicle                                   | CA-MEK5a               | 5                                  | 0.6509                              | Yes                                | Two-way ANOVA Tukey post hoc multiple comparison test                                                | 0.0001                |
|                                               | CA-MEK5a+Ox-LDL        | 5                                  | 0.814                               | Yes                                |                                                                                                      |                       |
| 1G: ox-LDL                                    | CA-MEK5a+Vehicle       | 5                                  | 0.814                               | Yes                                | Two-way ANOVA Tukey post hoc multiple comparison test                                                | 0.0001                |
|                                               | CA-MEK5a+FMK-MEA       | 5                                  | 0.8073                              | Yes                                |                                                                                                      |                       |
| 1H: WT                                        | CA-MEK5a               | 5                                  | 0.1536                              | Yes                                | Two-way ANOVA Tukey post hoc multiple comparison test                                                | 0.000001              |
|                                               | CA-MEK5a+Ox-LDL        | 5                                  | 0.4511                              | Yes                                |                                                                                                      |                       |
| 1H: ox-LDL                                    | CA-MEK5a+WT            | 5                                  | 0.451                               | Yes                                | Two-way ANOVA Tukey post hoc multiple comparison test                                                | 0.00026               |
|                                               | CA-MEK5a+ERKS S496A KI | 5                                  | 0.474                               | Yes                                |                                                                                                      |                       |
| 1J: TRX1, WT                                  | Vehicle                | 5                                  | 0.3254                              | Yes                                | Two-way ANOVA Tukey post hoc multiple comparison test                                                | 0.00003               |
|                                               | ox-LDL                 | 5                                  | 0.8073                              | Yes                                |                                                                                                      |                       |
| 1J: TRX1, ox-LDL                              | Vehicle                | 5                                  | 0.6972                              | Yes                                | Two-way ANOVA Tukey post hoc multiple comparison test                                                | 0.00032               |
|                                               | ERKS S496A KI          | 5                                  | 0.8073                              | Yes                                |                                                                                                      |                       |
| 1J: HO1, WT                                   | Vehicle                | 5                                  | 0.3254                              | Yes                                | Two-way ANOVA Tukey post hoc multiple comparison test                                                | 0.000176              |
|                                               | ox-LDL                 | 5                                  | 0.2005                              | Yes                                |                                                                                                      |                       |
| 1J: HO1, ox-LDL                               | Vehicle                | 5                                  | 0.2005                              | Yes                                | Two-way ANOVA Tukey post hoc multiple comparison test                                                | 0.00054               |
|                                               | ERKS S496A KI          | 5                                  | 0.4597                              | Yes                                |                                                                                                      |                       |
| 1J: CD36, WT                                  | Vehicle                | 5                                  | 0.3254                              | Yes                                | Two-way ANOVA Tukey post hoc multiple comparison test                                                | 0.000006              |
|                                               | ox-LDL                 | 5                                  | 0.8779                              | Yes                                |                                                                                                      |                       |
| 1J: CD36, ox-LDL                              | Vehicle                | 5                                  | 0.8779                              | Yes                                | Two-way ANOVA Tukey post hoc multiple comparison test                                                | 0.014                 |
|                                               | ERKS S496A KI          | 5                                  | 0.3597                              | Yes                                |                                                                                                      |                       |
| 1J: p53, WT                                   | Vehicle                | 5                                  | 0.3254                              | Yes                                | Two-way ANOVA Tukey post hoc multiple comparison test                                                | 0.00138               |
|                                               | ox-LDL                 | 5                                  | 0.0995                              | Yes                                |                                                                                                      |                       |
| 1J: p53, ox-LDL                               | Vehicle                | 5                                  | 0.2527                              | Yes                                | Two-way ANOVA Tukey post hoc multiple comparison test                                                | 0.01803               |
|                                               | ERKS S496A KI          | 5                                  | 0.3254                              | Yes                                |                                                                                                      |                       |
| 1J: p21, WT                                   | Vehicle                | 5                                  | 0.3254                              | Yes                                | Two-way ANOVA Tukey post hoc multiple comparison test                                                | 0.00001               |
|                                               | ox-LDL                 | 5                                  | 0.6642                              | Yes                                |                                                                                                      |                       |
| 1J: p21, ox-LDL                               | Vehicle                | 5                                  | 0.6642                              | Yes                                | Two-way ANOVA Tukey post hoc multiple comparison test                                                | 0.00001               |
|                                               | ERKS S496A KI          | 5                                  | 0.3254                              | Yes                                |                                                                                                      |                       |
| 1J: p16, WT                                   | Vehicle                | 5                                  | 0.6642                              | Yes                                | Two-way ANOVA Tukey post hoc multiple comparison test                                                | 0.00003               |
|                                               | ox-LDL                 | 5                                  | 0.3254                              | Yes                                |                                                                                                      |                       |
| 1J: p16, ox-LDL                               | Vehicle                | 5                                  | 0.5984                              | Yes                                | Two-way ANOVA Tukey post hoc multiple comparison test                                                | 0.00032               |
|                                               | ERKS S496A KI          | 5                                  | 0.3254                              | Yes                                |                                                                                                      |                       |
| 1J: GAS6, WT                                  | Vehicle                | 5                                  | 0.3254                              | Yes                                | Two-way ANOVA Tukey post hoc multiple comparison test                                                | 0.00008               |
|                                               | ox-LDL                 | 5                                  | 0.3025                              | Yes                                |                                                                                                      |                       |
| 1J: GAS6, ox-LDL                              | Vehicle                | 5                                  | 0.3025                              | Yes                                | Two-way ANOVA Tukey post hoc multiple comparison test                                                | 0.00089               |
|                                               | ERKS S496A KI          | 5                                  | 0.1909                              | Yes                                |                                                                                                      |                       |
| 1J: TNF $\alpha$ , WT                         | Vehicle                | 5                                  | 0.3254                              | Yes                                | Two-way ANOVA Tukey post hoc multiple comparison test                                                | 0.00048               |
|                                               | ox-LDL                 | 5                                  | 0.0605                              | Yes                                |                                                                                                      |                       |
| 1J: TNF $\alpha$ , ox-LDL                     | Vehicle                | 5                                  | 0.0605                              | Yes                                | Two-way ANOVA Tukey post hoc multiple comparison test                                                | 0.00095               |
|                                               | ERKS S496A KI          | 5                                  | 0.6983                              | Yes                                |                                                                                                      |                       |
| 1J: DNMT3a, WT                                | Vehicle                | 5                                  | 0.3254                              | Yes                                | Two-way ANOVA Tukey post hoc multiple comparison test                                                | 0.00142               |
|                                               | ox-LDL                 | 5                                  | 0.0589                              | Yes                                |                                                                                                      |                       |
| 1J: DNMT3a, ox-LDL                            | Vehicle                | 5                                  | 0.0589                              | Yes                                | Two-way ANOVA Tukey post hoc multiple comparison test                                                | 0.00215               |
|                                               | ERKS S496A KI          | 5                                  | 0.315                               | Yes                                |                                                                                                      |                       |
| 1K: WT                                        | Vehicle                | 8                                  | 0.9287                              | Yes                                | Two-way ANOVA Tukey post hoc multiple comparison test                                                | 0.000001              |
|                                               | ox-LDL                 | 8                                  | 0.5499                              | Yes                                |                                                                                                      |                       |
| 1K: ox-LDL                                    | Vehicle                | 8                                  | 0.5499                              | Yes                                | Two-way ANOVA Tukey post hoc multiple comparison test                                                | 0.000001              |
|                                               | ERKS S496A KI          | 8                                  | 0.308                               | Yes                                |                                                                                                      |                       |
| 1L: WT                                        | Vehicle                | 8                                  | 0.9379                              | Yes                                | Two-way ANOVA Tukey post hoc multiple comparison test                                                | 0.000001              |
|                                               | ox-LDL                 | 8                                  | 0.8878                              | Yes                                |                                                                                                      |                       |
| 1L: ox-LDL                                    | Vehicle                | 8                                  | 0.8878                              | Yes                                | Two-way ANOVA Tukey post hoc multiple comparison test                                                | 0.000001              |
|                                               | ERKS S496A KI          | 8                                  | 0.2338                              | Yes                                |                                                                                                      |                       |
| 1M: WT                                        | Vehicle                | 8                                  | 0.317                               | Yes                                | Two-way ANOVA Tukey post hoc multiple comparison test                                                | 0.0052                |
|                                               | ox-LDL                 | 8                                  | 0.4827                              | Yes                                |                                                                                                      |                       |
| 1M: ox-LDL                                    | Vehicle                | 8                                  | 0.4827                              | Yes                                | Two-way ANOVA Tukey post hoc multiple comparison test                                                | 0.012                 |
|                                               | ERKS S496A KI          | 8                                  | 0.5084                              | Yes                                |                                                                                                      |                       |
| 1N: WT                                        | Vehicle                | 8                                  | 0.637                               | Yes                                | Two-way ANOVA Tukey post hoc multiple comparison test                                                | 0.000001              |
|                                               | ox-LDL                 | 8                                  | 0.631                               | Yes                                |                                                                                                      |                       |
| 1N: ox-LDL                                    | Vehicle                | 8                                  | 0.631                               | Yes                                | Two-way ANOVA Tukey post hoc multiple comparison test                                                | 0.000009              |
|                                               | ERKS S496A KI          | 8                                  | 0.5209                              | Yes                                |                                                                                                      |                       |
| 1O: WT                                        | Vehicle                | 8                                  | 0.284                               | Yes                                | Two-way ANOVA Tukey post hoc multiple comparison test                                                | 0.000001              |
|                                               | ox-LDL                 | 8                                  | 0.216                               | Yes                                |                                                                                                      |                       |
| 1O: ox-LDL                                    | Vehicle                | 8                                  | 0.216                               | Yes                                | Two-way ANOVA Tukey post hoc multiple comparison test                                                | 0.000001              |
|                                               | ERKS S496A KI          | 8                                  | 0.0522                              | Yes                                |                                                                                                      |                       |
| 3C                                            | WT                     | 1,000 (sampling by base R package) | 4.38E-14                            | No                                 | Wilcoxon signed-rank test                                                                            | 0.1866                |
|                                               | ERKS S496A             | 1,000 (sampling by base R package) | 4.52E-14                            | No                                 |                                                                                                      |                       |
| 3D                                            | WT                     | 1,000 (sampling by base R package) | 2.16E-05                            | No                                 | Wilcoxon signed-rank test                                                                            | 2.20E-16              |
|                                               | ERKS S496A             | 1,000 (sampling by base R package) | 1.78E-01                            | No                                 |                                                                                                      |                       |
| 3E                                            | WT                     | 1,000 (sampling by base R package) | 2.32E-04                            | No                                 | Wilcoxon signed-rank test                                                                            | 2.20E-16              |
|                                               | ERKS S496A KI          | 1,000 (sampling by base R package) | 1.26E-03                            | No                                 |                                                                                                      |                       |
| 3G: WT                                        | NC2                    | 8                                  | 0.214                               | Yes                                | Two-way ANOVA Tukey post hoc multiple comparison test                                                | 0.0017                |
|                                               | HFD                    | 8                                  | 0.1052                              | Yes                                |                                                                                                      |                       |
| 3G: HFD                                       | WT                     | 8                                  | 0.1052                              | Yes                                | Two-way ANOVA Tukey post hoc multiple comparison test                                                | 0.024                 |
|                                               | ERKS S496A KI          | 8                                  | 0.221                               | Yes                                |                                                                                                      |                       |
| 3H: WT                                        | NC2                    | 8                                  | 0.09287                             | Yes                                | Two-way ANOVA Tukey post hoc multiple comparison test                                                | 0.00000001            |
|                                               | HFD                    | 8                                  | 0.1053                              | Yes                                |                                                                                                      |                       |
| 3H: HFD                                       | WT                     | 8                                  | 0.1053                              | Yes                                | Two-way ANOVA Tukey post hoc multiple comparison test                                                | 0.00000001            |
|                                               | ERKS S496A KI          | 8                                  | 0.8624                              | Yes                                |                                                                                                      |                       |
| 3I: WT                                        | NC2                    | 8                                  | 0.284                               | Yes                                | Two-way ANOVA Tukey post hoc multiple comparison test                                                | 0.000001              |
|                                               | HFD                    | 8                                  | 0.216                               | Yes                                |                                                                                                      |                       |
| 3I: HFD                                       | WT                     | 8                                  | 0.216                               | Yes                                | Two-way ANOVA Tukey post hoc multiple comparison test                                                | 0.00058               |
|                                               | ERKS S496A KI          | 8                                  | 0.0522                              | Yes                                |                                                                                                      |                       |
| 3J: WT                                        | NC2                    | 8                                  | 0.1659                              | Yes                                | Two-way ANOVA Tukey post hoc multiple comparison test                                                | 0.00014               |
|                                               | HFD                    | 8                                  | 0.3339                              | Yes                                |                                                                                                      |                       |
| 3J: HFD                                       | WT                     | 8                                  | 0.3339                              | Yes                                | Two-way ANOVA Tukey post hoc multiple comparison test                                                | 0.00018               |
|                                               | ERKS S496A KI          | 8                                  | 0.1383                              | Yes                                |                                                                                                      |                       |
| 3K: WT                                        | NC2                    | 8                                  | 0.2675                              | Yes                                | Two-way ANOVA Tukey post hoc multiple comparison test                                                | 3.20518E-08           |
|                                               | HFD                    | 8                                  | 0.2452                              | Yes                                |                                                                                                      |                       |
| 3K: HFD                                       | WT                     | 8                                  | 0.2452                              | Yes                                | Two-way ANOVA Tukey post hoc multiple comparison test                                                | 2.34209E-08           |
|                                               | ERKS S496A KI          | 8                                  | 0.6159                              | Yes                                |                                                                                                      |                       |
| 3M                                            | WT                     | 13                                 | 0.5792                              | Yes                                | Unpaired Student's t-test, two-tailed                                                                | 0.0001                |
|                                               | ERKS S496A KI          | 13                                 | 0.4784                              | Yes                                |                                                                                                      |                       |
| 3O                                            | WT                     | 14                                 | 0.0089                              | Yes                                | Non parametric unpaired Mann-Whitney test                                                            | 0.000001              |
|                                               | ERKS S496A KI          | 13                                 | 0.1024                              | Yes                                |                                                                                                      |                       |
| 4K                                            | siCont                 | 8                                  | 0.2843                              | Yes                                | Unpaired Student's t-test, two-tailed                                                                | 0.0002                |
|                                               | siAHR                  | 8                                  | 0.0362                              | Yes                                |                                                                                                      |                       |
| 5K: WT                                        | Control                | 8                                  | 0.0529                              | Yes                                | Two-way ANOVA Tukey post hoc multiple comparison test                                                | 0.000001              |
|                                               | ox-LDL                 | 8                                  | 0.6693                              | Yes                                |                                                                                                      |                       |
| 5K: ox-LDL                                    | WT                     | 8                                  | 0.0529                              | Yes                                | Two-way ANOVA Tukey post hoc multiple comparison test                                                | 0.000006              |
|                                               | ERKS S496A             | 8                                  | 0.3233                              | Yes                                |                                                                                                      |                       |
| 5K: ox-LDL                                    | WT (control)           | 8                                  | 0.0928                              | Yes                                | One-way ANOVA non parametric Kruskal-Wallis test followed by Dunn post hoc multiple comparison tests | 0.3938                |
|                                               | AM2B-62                | 8                                  | 0.00774                             | No                                 |                                                                                                      |                       |
| 6A: WT                                        | WT (control)           | 8                                  | 0.0529                              | Yes                                | Two-way ANOVA Tukey post hoc multiple comparison test                                                | 0.00005               |
|                                               | AX15838                | 8                                  | 0.2674                              | Yes                                |                                                                                                      |                       |
| 6A: ox-LDL                                    | Vehicle                | 8                                  | 0.8754                              | Yes                                | Two-way ANOVA Tukey post hoc multiple comparison test                                                | 0.00044               |
|                                               | ox-LDL                 | 8                                  | 0.8754                              | Yes                                |                                                                                                      |                       |
| 6A: ox-LDL                                    | ERKS S496A KI          | 8                                  | 0.8754                              | Yes                                | Two-way ANOVA Tukey post hoc multiple comparison test                                                | 0.00003               |
|                                               | Control                | 8                                  | 0.2709                              | Yes                                |                                                                                                      |                       |
| 6A: WT (Mid panel)                            | ox-LDL                 | 8                                  | 0.1588                              | Yes                                | Two-way ANOVA Tukey post hoc multiple comparison test                                                | 0.0001                |
|                                               | Control                | 8                                  | 0.3183                              | Yes                                |                                                                                                      |                       |
| 6A: vehicle                                   | ox-LDL                 | 8                                  | 0.2119                              | Yes                                | Two-way ANOVA Tukey post hoc multiple comparison test                                                | 0.0001                |
|                                               | Control                | 8                                  | 0.4617                              | Yes                                |                                                                                                      |                       |
| 6A: ox-LDL                                    | Vehicle                | 8                                  | 0.4517                              | Yes                                | Two-way ANOVA Tukey post hoc multiple comparison test                                                | 0.002                 |
|                                               | AX15838                | 8                                  | 0.055                               | Yes                                |                                                                                                      |                       |
| 6C: WT                                        | Vehicle                | 5                                  | 0.3254                              | Yes                                | Two-way ANOVA Tukey post hoc multiple comparison test                                                | 0.000007              |
|                                               | ox-LDL                 | 5                                  | 0.8613                              | Yes                                |                                                                                                      |                       |
| 6C: ox-LDL                                    | Vehicle                | 5                                  | 0.8613                              | Yes                                | Two-way ANOVA Tukey post hoc multiple comparison test                                                | 0.000078              |
|                                               | ERKS S496A             | 5                                  | 0.1641                              | Yes                                |                                                                                                      |                       |
| 6D: WT                                        | Vehicle                | 5                                  | 0.3254                              | Yes                                | Two-way ANOVA Tukey post hoc multiple comparison test                                                | 0.000001              |
|                                               | ox-LDL                 | 5                                  | 0.519                               | Yes                                |                                                                                                      |                       |
| 6D: ox-LDL                                    | Vehicle                | 5                                  | 0.7869                              | Yes                                | Two-way ANOVA Tukey post hoc multiple comparison test                                                | 0.000002              |
|                                               | NEFK251BR              | 5                                  | 0.3104                              | Yes                                |                                                                                                      |                       |
| 6E: WT                                        | Vehicle                | 8                                  | 0.1058                              | Yes                                | Two-way ANOVA Tukey post hoc multiple comparison test                                                | 0.0016                |
|                                               | ox-LDL                 | 8                                  | 0.0982                              | Yes                                |                                                                                                      |                       |
| 6E: ox-LDL                                    | Vehicle                | 8                                  | 0.0982                              | Yes                                | Two-way ANOVA Tukey post hoc multiple comparison test                                                | 0.036                 |
|                                               | NEFK251BR              | 8                                  | 0.1177                              | Yes                                |                                                                                                      |                       |
| 6F: WT                                        | Vehicle                | 8                                  | 0.3076                              | Yes                                | Two-way ANOVA Tukey post hoc multiple comparison test                                                | 2.15642E-08           |
|                                               | ox-LDL                 | 8                                  | 0.3662                              | Yes                                |                                                                                                      |                       |
| 6F: ox-LDL                                    | Vehicle                | 8                                  | 0.3662                              | Yes                                | Two-way ANOVA Tukey post hoc multiple comparison test                                                | 1.56888E-06           |
|                                               | NEFK251BR              | 8                                  | 0.0517                              | Yes                                |                                                                                                      |                       |
| 6G: WT                                        | Vehicle                | 8                                  | 0.5444                              | Yes                                | Two-way ANOVA Tukey post hoc multiple comparison test                                                | 0.000001              |
|                                               | ox-LDL                 | 8                                  | 0.2236                              | Yes                                |                                                                                                      |                       |
| 6G: ox-LDL                                    | Vehicle                | 8                                  | 0.2236                              | Yes                                | Two-way ANOVA Tukey post hoc multiple comparison test                                                | 0.00012               |
|                                               | NEFK251BR              | 8                                  | 0.2234                              | Yes                                |                                                                                                      |                       |
| 6H: WT                                        | Vehicle                | 5                                  | 0.6495                              | Yes                                | Two-way ANOVA Tukey post hoc multiple comparison test                                                | 0.00001               |
|                                               | ox-LDL                 | 5                                  | 0.3786                              | Yes                                |                                                                                                      |                       |
| 6H: ox-LDL                                    | Vehicle                | 5                                  | 0.3786                              | Yes                                | Two-way ANOVA Tukey post hoc multiple comparison test                                                | 0.0001                |
|                                               | NEFK251BR              | 5                                  | 0.3658                              | Yes                                |                                                                                                      |                       |
| 6I: WT                                        | Vehicle                | 8                                  | 0.3571                              | Yes                                | Two-way ANOVA Tukey post hoc multiple comparison test                                                | 0.012                 |
|                                               | ox-LDL                 | 8                                  | 0.1                                 | Yes                                |                                                                                                      |                       |
| 6I: ox-LDL                                    | Vehicle                | 8                                  | 0.1                                 | Yes                                | Two-way ANOVA Tukey post hoc multiple comparison test                                                | 0.041                 |
|                                               | NEFK251BR              | 8                                  | 0.1236                              | Yes                                |                                                                                                      |                       |
| 7B: Maximum respiration                       | WT                     | 5                                  | 0.7951                              | Yes                                | Two-way ANOVA Tukey post hoc multiple comparison test                                                | 0.000001              |
|                                               | WT+ox-LDL              | 5                                  | 0.2345                              | Yes                                |                                                                                                      |                       |
| 7B: Maximum respiration                       | WT+ox-LDL              | 5                                  | 0.2345                              | Yes                                | Two-way ANOVA Tukey post hoc multiple comparison test                                                | 0.000001              |
|                                               | ERKS S496A+ox-LDL      | 5                                  | 0.8263                              | Yes                                |                                                                                                      |                       |
| 7B: SRC                                       | WT+ox-LDL              | 5                                  | 0.8263                              | Yes                                | Two-way ANOVA Tukey post hoc multiple comparison test                                                | 0.000001              |
|                                               | ERKS S496A+ox-LDL      | 5                                  | 0.5078                              | Yes                                |                                                                                                      |                       |
| 7D: Glycolysis                                | WT                     | 4 ( Seahorse)                      | 0.85                                | Yes                                | Two-way ANOVA Tukey post hoc multiple comparison test                                                | 0.0471                |
|                                               | WT+ox-LDL              | 4 ( Seahorse)                      | 0.0643                              | Yes                                |                                                                                                      |                       |
| 7D: Glycolysis                                | WT+ox-LDL              | 4 ( Seahorse)                      | 0.0643                              | Yes                                | Two-way ANOVA Tukey post hoc multiple comparison test                                                | 0.003                 |
|                                               | ERKS S496A+ox-LDL      | 4 ( Seahorse)                      | 0.2842                              | Yes                                |                                                                                                      |                       |
| 7D: Glycolytic capacity                       | WT                     | 4 ( Seahorse)                      | 0.3315                              | Yes                                | Two-way ANOVA Tukey post hoc multiple comparison test                                                | 0.0008                |
|                                               | WT+ox-LDL              | 4 ( Seahorse)                      | 0.1612                              | Yes                                |                                                                                                      |                       |

|                                  |                  |                                             |          |     |                                                                                                      |             |
|----------------------------------|------------------|---------------------------------------------|----------|-----|------------------------------------------------------------------------------------------------------|-------------|
| 7D: Glycolytic capacity          | WT+oxLDL         | 4 (Seahorse)                                | 0.1612   | Yes |                                                                                                      |             |
|                                  | ERKS5496A+oxLDL  | 4 (Seahorse)                                | 0.6682   | Yes | Two-way ANOVA Tukey post hoc multiple comparison test                                                | 0.00001     |
| 7E: WT                           | Vehicle          | 8                                           | 0.0637   | Yes |                                                                                                      |             |
|                                  | oxLDL            | 8                                           | 0.3917   | Yes | Two-way ANOVA Tukey post hoc multiple comparison test                                                | 0.0013      |
| 7E: oxLDL                        | WT               | 8                                           | 0.3917   | Yes |                                                                                                      |             |
|                                  | ERKS 5496A KI    | 8                                           | 0.871    | Yes | Two-way ANOVA Tukey post hoc multiple comparison test                                                | 0.027       |
| 7F: WT                           | Vehicle          | 8                                           | 0.5092   | Yes |                                                                                                      |             |
|                                  | oxLDL            | 8                                           | 0.3216   | Yes | Two-way ANOVA Tukey post hoc multiple comparison test                                                | 0.000108    |
| 7F: oxLDL                        | WT               | 8                                           | 0.3216   | Yes |                                                                                                      |             |
|                                  | ERKS 5496A KI    | 8                                           | 0.1534   | Yes | Two-way ANOVA Tukey post hoc multiple comparison test                                                | 0.000032    |
| 7H: Maximum respiration          | NR2F2WT          | 5 (Seahorse)                                | 0.3497   | Yes |                                                                                                      |             |
|                                  | NR2F2WT+oxLDL    | 5 (Seahorse)                                | 0.2022   | Yes | Two-way ANOVA Tukey post hoc multiple comparison test                                                | 0.00001     |
| 7H: Maximum respiration          | NR2F2WT+oxLDL    | 5 (Seahorse)                                | 0.2022   | Yes |                                                                                                      |             |
|                                  | NR2F2K518R+oxLDL | 5 (Seahorse)                                | 0.1931   | Yes | Two-way ANOVA Tukey post hoc multiple comparison test                                                | 0.000011    |
| 7H: SRC                          | NR2F2WT          | 5 (Seahorse)                                | 0.1568   | Yes |                                                                                                      |             |
|                                  | NR2F2WT+oxLDL    | 5 (Seahorse)                                | 0.2182   | Yes | Two-way ANOVA Tukey post hoc multiple comparison test                                                | 0.01        |
| 7H: SRC                          | NR2F2WT+oxLDL    | 5 (Seahorse)                                | 0.2182   | Yes |                                                                                                      |             |
|                                  | NR2F2K518R+oxLDL | 5 (Seahorse)                                | 0.2554   | Yes | Two-way ANOVA Tukey post hoc multiple comparison test                                                | 0.0012      |
| 7J: Non-glycolytic acidification | NR2F2WT          | 4 (Seahorse)                                | 0.3408   | Yes |                                                                                                      |             |
|                                  | NR2F2WT+oxLDL    | 4 (Seahorse)                                | 0.9813   | Yes | One-way ANOVA Tukey post hoc multiple comparison test                                                | 0.0084      |
| 7J: Non-glycolytic acidification | NR2F2K518R+oxLDL | 4 (Seahorse)                                | 0.8913   | Yes |                                                                                                      |             |
|                                  | NR2F2K518R+oxLDL | 4 (Seahorse)                                | 0.2679   | Yes | One-way ANOVA Tukey post hoc multiple comparison test                                                | 0.0048      |
| 7K: NR2F2WT                      | Vehicle          | 8                                           | 0.11     | Yes |                                                                                                      |             |
|                                  | oxLDL            | 8                                           | 0.051    | Yes | Two-way ANOVA Tukey post hoc multiple comparison test                                                | 0.000011    |
| 7K: oxLDL                        | NR2F2WT          | 8                                           | 0.051    | Yes |                                                                                                      |             |
|                                  | NR2F2K518R       | 8                                           | 0.299    | Yes | Two-way ANOVA Tukey post hoc multiple comparison test                                                | 0.015       |
| 7L: NR2F2WT                      | Vehicle          | 8                                           | 0.14     | Yes |                                                                                                      |             |
|                                  | oxLDL            | 8                                           | 0.4684   | Yes | Two-way ANOVA Tukey post hoc multiple comparison test                                                | 6.2314E-11  |
| 7L: oxLDL                        | NR2F2WT          | 8                                           | 0.4684   | Yes |                                                                                                      |             |
|                                  | NR2F2K518R       | 8                                           | 0.0662   | Yes | Two-way ANOVA Tukey post hoc multiple comparison test                                                | 2.9228E-08  |
| S1B: Baseline                    | WT               | 13                                          | 0.4918   | Yes |                                                                                                      |             |
|                                  | ERKS 5496A KI    | 28                                          | 0.2862   | Yes | Unpaired Student's t-test, two-tailed                                                                | 0.1848      |
| S1B: Time of sacrifice           | WT               | 13                                          | 0.7965   | Yes |                                                                                                      |             |
|                                  | ERKS 5496A KI    | 28                                          | 0.2748   | Yes | Unpaired Student's t-test, two-tailed                                                                | 0.0743      |
| S1C: HDL                         | WT               | 11                                          | 0.272    | Yes |                                                                                                      |             |
|                                  | ERKS 5496A KI    | 15                                          | 0.4719   | Yes | Unpaired Student's t-test, two-tailed                                                                | 0.3637      |
| S1C: LDL                         | WT               | 13                                          | 0.5809   | Yes |                                                                                                      |             |
|                                  | ERKS 5496A KI    | 13                                          | 0.318    | Yes | Unpaired Student's t-test, two-tailed                                                                | 0.083       |
| S1D                              | WT               | 7                                           | 0.2884   | Yes |                                                                                                      |             |
|                                  | ERKS 5496A KI    | 7                                           | 0.3486   | Yes | Unpaired Student's t-test, two-tailed                                                                | 0.4344      |
| S1E                              | WT               | 7                                           | 0.1298   | Yes |                                                                                                      |             |
|                                  | ERKS 5496A KI    | 7                                           | 0.6839   | Yes | Unpaired Student's t-test, two-tailed                                                                | 0.279       |
| S1F: WT                          | Vehicle          | 8                                           | 0.549273 | Yes |                                                                                                      |             |
|                                  | oxLDL            | 8                                           | 0.146479 | Yes | Two-way ANOVA Tukey post hoc multiple comparison test                                                | 9.39136E-09 |
| S1F: oxLDL                       | WT               | 8                                           | 0.146479 | Yes |                                                                                                      |             |
|                                  | ERKS 5496A KI    | 8                                           | 0.18912  | Yes | Two-way ANOVA Tukey post hoc multiple comparison test                                                | 1.46207E-05 |
| S1G: Vehicle                     | Vehicle          | 8                                           | 0.1596   | Yes |                                                                                                      |             |
|                                  | oxLDL            | 8                                           | 0.607    | Yes | Two-way ANOVA Tukey post hoc multiple comparison test                                                | 3.17047E-09 |
| S1G: oxLDL                       | Vehicle          | 8                                           | 0.607    | Yes |                                                                                                      |             |
|                                  | MitoTEMPOL       | 8                                           | 0.4209   | Yes | Two-way ANOVA Tukey post hoc multiple comparison test                                                | 8.15864E-08 |
| S1H: WT                          | NCD              | 8                                           | 0.0088   | No  | One-way ANOVA non parametric Kruskal-Wallis test followed by Dunn post hoc multiple comparison tests | 2.40571E-05 |
|                                  | HFD              | 8                                           | 0.541    | Yes |                                                                                                      |             |
| S1H: HFD                         | WT               | 8                                           | 0.541    | Yes |                                                                                                      |             |
|                                  | ERKS5496A        | 8                                           | 0.21     | Yes | Two-way ANOVA Tukey post hoc multiple comparison test                                                | 3.73298E-10 |
| S1I: oxLDL                       | WT               | 5                                           | 0.3633   | Yes |                                                                                                      |             |
|                                  | ERKS5496A        | 5                                           | 0.7467   | Yes | Two-way ANOVA Tukey post hoc multiple comparison test                                                | 4.71E-13    |
| S1I: oxLDL                       | Vehicle          | 5                                           | 0.3233   | Yes |                                                                                                      |             |
|                                  | XNDA92           | 5                                           | 0.1291   | Yes | Two-way ANOVA Tukey post hoc multiple comparison test                                                | 4.71E-13    |
| S1I: oxLDL                       | Vehicle          | 5                                           | 0.3633   | Yes |                                                                                                      |             |
|                                  | AXT5636          | 5                                           | 0.8493   | Yes | Two-way ANOVA Tukey post hoc multiple comparison test                                                | 4.71E-13    |
| S2A                              | WT               | 5                                           | 0.1299   | Yes |                                                                                                      |             |
|                                  | ERKS 5496A KI    | 5                                           | 0.2555   | Yes | Unpaired Student's t-test, two-tailed                                                                | 0.03        |
| S2B                              | WT               | 5                                           | 0.6407   | Yes |                                                                                                      |             |
|                                  | ERKS 5496A KI    | 5                                           | 0.502    | Yes | Unpaired Student's t-test, two-tailed                                                                | 0.0194      |
| S2C                              | WT               | 5                                           | 0.9414   | Yes |                                                                                                      |             |
|                                  | ERKS 5496A KI    | 5                                           | 0.7121   | Yes | Unpaired Student's t-test, two-tailed                                                                | 0.0399      |
| S2F: WT                          | Vehicle          | 8                                           | 0.1032   | Yes |                                                                                                      |             |
|                                  | oxLDL            | 8                                           | 0.0827   | Yes | Two-way ANOVA Tukey post hoc multiple comparison test                                                | 0.001       |
| S2F: oxLDL                       | WT               | 8                                           | 0.0827   | Yes |                                                                                                      |             |
|                                  | ERKS 5496A KI    | 8                                           | 0.3408   | Yes | Two-way ANOVA Tukey post hoc multiple comparison test                                                | 0.0092      |
| S3-p-p90SK WT                    | NCD              | 5                                           | 0.3254   | Yes |                                                                                                      |             |
|                                  | HFD              | 5                                           | 0.0841   | Yes | Two-way ANOVA Tukey post hoc multiple comparison test                                                | 0.00001     |
| S3-pERKS5496 WT                  | NCD              | 5                                           | 0.3254   | Yes |                                                                                                      |             |
|                                  | HFD              | 5                                           | 0.2257   | Yes | Two-way ANOVA Tukey post hoc multiple comparison test                                                | 0.00001     |
| S3-pERKS5496 HFD                 | WT               | 5                                           | 0.0615   | Yes |                                                                                                      |             |
|                                  | ERKS 5496A KI    | 5                                           | 0.3254   | Yes | Two-way ANOVA Tukey post hoc multiple comparison test                                                | 0.000002    |
| S3: TRX1 WT                      | NCD              | 5                                           | 0.1937   | Yes |                                                                                                      |             |
|                                  | HFD              | 5                                           | 0.1937   | Yes | Two-way ANOVA Tukey post hoc multiple comparison test                                                | 0.000099    |
| S3: TRX1 HFD                     | WT               | 5                                           | 0.1937   | Yes |                                                                                                      |             |
|                                  | ERKS 5496A KI    | 5                                           | 0.3486   | Yes | Two-way ANOVA Tukey post hoc multiple comparison test                                                | 0.000706    |
| S3: HO1 WT                       | NCD              | 5                                           | 0.3254   | Yes |                                                                                                      |             |
|                                  | HFD              | 5                                           | 0.1763   | Yes | Two-way ANOVA Tukey post hoc multiple comparison test                                                | 0.018122    |
| S3: HO1 HFD                      | WT               | 5                                           | 0.1763   | Yes |                                                                                                      |             |
|                                  | ERKS 5496A KI    | 5                                           | 0.2383   | Yes | Two-way ANOVA Tukey post hoc multiple comparison test                                                | 0.000102    |
| S3: CD36 WT                      | NCD              | 5                                           | 0.3254   | Yes |                                                                                                      |             |
|                                  | HFD              | 5                                           | 0.1111   | Yes | Two-way ANOVA Tukey post hoc multiple comparison test                                                | 0.000378    |
| S3: CD36 HFD                     | WT               | 5                                           | 0.1111   | Yes |                                                                                                      |             |
|                                  | ERKS 5496A KI    | 5                                           | 0.4816   | Yes | Two-way ANOVA Tukey post hoc multiple comparison test                                                | 0.000009    |
| S3: p21 WT                       | NCD              | 5                                           | 0.3254   | Yes |                                                                                                      |             |
|                                  | HFD              | 5                                           | 0.471    | Yes | Two-way ANOVA Tukey post hoc multiple comparison test                                                | 0.000023    |
| S3: p21 HFD                      | WT               | 5                                           | 0.471    | Yes |                                                                                                      |             |
|                                  | ERKS 5496A KI    | 5                                           | 0.544    | Yes | Two-way ANOVA Tukey post hoc multiple comparison test                                                | 0.000073    |
| S3: p16 WT                       | NCD              | 5                                           | 0.3254   | Yes |                                                                                                      |             |
|                                  | HFD              | 5                                           | 0.9573   | Yes | Two-way ANOVA Tukey post hoc multiple comparison test                                                | 0.000022    |
| S3: p16 HFD                      | WT               | 5                                           | 0.9573   | Yes |                                                                                                      |             |
|                                  | ERKS 5496A KI    | 5                                           | 0.2217   | Yes | Two-way ANOVA Tukey post hoc multiple comparison test                                                | 0.00001     |
| S3: p53 WT                       | NCD              | 5                                           | 0.3254   | Yes |                                                                                                      |             |
|                                  | HFD              | 5                                           | 0.1613   | Yes | Two-way ANOVA Tukey post hoc multiple comparison test                                                | 0.000866    |
| S3: p53 HFD                      | WT               | 5                                           | 0.1613   | Yes |                                                                                                      |             |
|                                  | ERKS 5496A KI    | 5                                           | 0.2668   | Yes | Two-way ANOVA Tukey post hoc multiple comparison test                                                | 0.019064    |
| S3: GAS6 WT                      | NCD              | 5                                           | 0.3254   | Yes |                                                                                                      |             |
|                                  | HFD              | 5                                           | 0.3228   | Yes | Two-way ANOVA Tukey post hoc multiple comparison test                                                | 0.024662    |
| S3: GAS6 HFD                     | WT               | 5                                           | 0.3228   | Yes |                                                                                                      |             |
|                                  | ERKS 5496A KI    | 5                                           | 0.6445   | Yes | Two-way ANOVA Tukey post hoc multiple comparison test                                                | 0.001363    |
| S3: TNFα WT                      | NCD              | 5                                           | 0.3254   | Yes |                                                                                                      |             |
|                                  | HFD              | 5                                           | 0.091    | Yes | Two-way ANOVA Tukey post hoc multiple comparison test                                                | 0.000021    |
| S3: TNFα HFD                     | WT               | 5                                           | 0.091    | Yes |                                                                                                      |             |
|                                  | ERKS 5496A KI    | 5                                           | 0.398    | Yes | Two-way ANOVA Tukey post hoc multiple comparison test                                                | 0.005759    |
| S3: DNMT3a WT                    | NCD              | 5                                           | 0.3254   | Yes |                                                                                                      |             |
|                                  | HFD              | 5                                           | 0.0558   | Yes | Two-way ANOVA Tukey post hoc multiple comparison test                                                | 0.000079    |
| S3: DNMT3a HFD                   | WT               | 5                                           | 0.0558   | Yes |                                                                                                      |             |
|                                  | ERKS 5496A KI    | 5                                           | 0.1596   | Yes | Two-way ANOVA Tukey post hoc multiple comparison test                                                | 0.001048    |
| S3: AHR WT                       | NCD              | 5                                           | 0.1185   | Yes |                                                                                                      |             |
|                                  | HFD              | 5                                           | 0.8644   | Yes | Two-way ANOVA Tukey post hoc multiple comparison test                                                | 0.028874    |
| S3: AHR HFD                      | WT               | 5                                           | 0.8644   | Yes |                                                                                                      |             |
|                                  | ERKS 5496A KI    | 5                                           | 0.5695   | Yes | Two-way ANOVA Tukey post hoc multiple comparison test                                                | 0.000001    |
| S3: 53BP1 WT                     | NCD              | 5                                           | 0.3254   | Yes |                                                                                                      |             |
|                                  | HFD              | 5                                           | 0.9204   | Yes | Two-way ANOVA Tukey post hoc multiple comparison test                                                | 0.000005    |
| S3: 53BP1 HFD                    | WT               | 5                                           | 0.9204   | Yes |                                                                                                      |             |
|                                  | ERKS 5496A KI    | 5                                           | 0.3254   | Yes | Two-way ANOVA Tukey post hoc multiple comparison test                                                | 0.000011    |
| S3: LAMINB1 WT                   | NCD              | 5                                           | 0.3254   | Yes |                                                                                                      |             |
|                                  | HFD              | 5                                           | 0.4718   | Yes | Two-way ANOVA Tukey post hoc multiple comparison test                                                | 0.000012    |
| S3: LAMINB1 HFD                  | WT               | 5                                           | 0.4718   | Yes |                                                                                                      |             |
|                                  | ERKS 5496A KI    | 5                                           | 0.431    | Yes | Two-way ANOVA Tukey post hoc multiple comparison test                                                | 0.000011    |
| S3: PCNA WT                      | NCD              | 5                                           | 0.3254   | Yes |                                                                                                      |             |
|                                  | HFD              | 5                                           | 0.9666   | Yes | Two-way ANOVA Tukey post hoc multiple comparison test                                                | 0.000007    |
| S3: PCNA HFD                     | WT               | 5                                           | 0.9666   | Yes |                                                                                                      |             |
|                                  | ERKS 5496A KI    | 5                                           | 0.6138   | Yes | Two-way ANOVA Tukey post hoc multiple comparison test                                                | 0.000023    |
| S4: IL-1b WT                     | NCD              | 4                                           | 0.693    | Yes |                                                                                                      |             |
|                                  | HFD              | 4                                           | 0.3343   | Yes | Two-way ANOVA Tukey post hoc multiple comparison test                                                | 0.00014     |
| S4: IL-1b HFD                    | WT               | 4                                           | 0.3343   | Yes |                                                                                                      |             |
|                                  | ERKS 5496A KI    | 4                                           | 0.1921   | Yes | Two-way ANOVA Tukey post hoc multiple comparison test                                                | 0.00014     |
| S4: TNFα WT                      | NCD              | 4                                           | 0.683    | Yes |                                                                                                      |             |
|                                  | HFD              | 4                                           | 0.8099   | Yes | Two-way ANOVA Tukey post hoc multiple comparison test                                                | 0.0006      |
| S4: TNFα HFD                     | WT               | 4                                           | 0.8099   | Yes |                                                                                                      |             |
|                                  | ERKS 5496A KI    | 4                                           | 0.2929   | Yes | Two-way ANOVA Tukey post hoc multiple comparison test                                                | 0.0021      |
| S4: INOS WT                      | NCD              | 4                                           | 0.883    | Yes |                                                                                                      |             |
|                                  | HFD              | 4                                           | 0.2515   | Yes | Two-way ANOVA Tukey post hoc multiple comparison test                                                | 0.000095    |
| S4: INOS HFD                     | WT               | 4                                           | 0.2515   | Yes |                                                                                                      |             |
|                                  | ERKS 5496A KI    | 4                                           | 0.2152   | Yes | Two-way ANOVA Tukey post hoc multiple comparison test                                                | 0.000015    |
| S4C: IL-1a                       | WT HFD           | 3 (Cytokine profile)                        | 0.0803   | Yes |                                                                                                      |             |
|                                  | ERKS 5496A HFD   | 3 (Cytokine profile)                        | 0.3991   | Yes | One-way ANOVA Tukey post hoc multiple comparison test                                                | 0.00099     |
| S4C: IL-1b                       | WT HFD           | 3 (Cytokine profile)                        | 0.4977   | Yes |                                                                                                      |             |
|                                  | ERKS 5496A HFD   | 3 (Cytokine profile)                        | 0.1869   | Yes | One-way ANOVA Tukey post hoc multiple comparison test                                                | 0.00011     |
| S4C: CXCL3                       | WT HFD           | 3 (Cytokine profile)                        | 0.7307   | Yes |                                                                                                      |             |
|                                  | ERKS 5496A HFD   | 3 (Cytokine profile)                        | 0.3929   | Yes | One-way ANOVA Tukey post hoc multiple comparison test                                                | 0.00018     |
| S5B: Maximum respiration         | WT+NCD           | 12(Seahorse from 5 independent experiments) | 0.1685   | Yes |                                                                                                      |             |
|                                  | WT+HFD           | 12(Seahorse from 5 independent experiments) | 0.429    | Yes | Two-way ANOVA Tukey post hoc multiple comparison test                                                | 0.000015    |
| S5B: Maximum respiration         | WT+HFD           | 12(Seahorse from 5 independent experiments) | 0.429    | Yes |                                                                                                      |             |
|                                  | ERKS5496A+HFD    | 12(Seahorse from 5 independent experiments) | 0.1105   | Yes | Two-way ANOVA Tukey post hoc multiple comparison test                                                | 0.000075    |
| S5B: SRC                         | WT+NCD           | 12(Seahorse from 5 independent experiments) | 0.1816   | Yes |                                                                                                      |             |
|                                  | WT+HFD           | 12(Seahorse from 5 independent experiments) | 0.7593   | Yes | Two-way ANOVA Tukey post hoc multiple comparison test                                                | 0.007       |
| S5B: SRC                         | WT+HFD           | 12(Seahorse from 5 independent experiments) | 0.7593   | Yes |                                                                                                      |             |
|                                  | ERKS5496A+HFD    | 12(Seahorse from 5 independent experiments) | 0.1517   | Yes | Two-way ANOVA Tukey post hoc multiple comparison test                                                | 0.0221      |
| S5D: Glycolysis                  | WT+NCD           | 5 (Seahorse)                                | 0.8447   | Yes |                                                                                                      |             |
|                                  | WT+HFD           | 5 (Seahorse)                                | 0.6487   | Yes | Two-way ANOVA Tukey post hoc multiple comparison test                                                | 0.000001    |
| S5D: Glycolysis                  | WT+HFD           | 5 (Seahorse)                                | 0.6487   | Yes |                                                                                                      |             |
|                                  | ERKS5496A+HFD    | 5 (Seahorse)                                | 0.6292   | Yes | Two-way ANOVA Tukey post hoc multiple comparison test                                                | 0.000001    |
| S5D: Glycolytic capacity         | WT+NCD           | 5 (Seahorse)                                | 0.42     | Yes |                                                                                                      |             |
|                                  | WT+HFD           | 5 (Seahorse)                                | 0.8927   | Yes | Two-way ANOVA Tukey post hoc multiple comparison test                                                | 0.000001    |
| S5D: Glycolytic capacity         | WT+HFD           | 5 (Seahorse)                                | 0.8927   | Yes |                                                                                                      |             |
|                                  | ERKS5496A+HFD    | 5 (Seahorse)                                | 0.9748   | Yes | Two-way ANOVA Tukey post hoc multiple comparison test                                                | 0.000001    |

| Figure #                 | Group         | Cell number          | Shapiro-Wilk normality test P value | Shapiro-Wilk normality test Passed | Applied statistical test(s) and results               | P (or Adjusted) Value | Applied statistical test(s) and results | P (or Adjusted) Value |
|--------------------------|---------------|----------------------|-------------------------------------|------------------------------------|-------------------------------------------------------|-----------------------|-----------------------------------------|-----------------------|
| S6D: Vehicle             | NCD           | 3                    | 0.9999                              | Yes                                | Two-way ANOVA Tukey post hoc multiple comparison test | 0.0001                |                                         |                       |
|                          | HFID          | 3                    | 0.1139                              | Yes                                |                                                       |                       |                                         |                       |
| S6D: HFID                | Vehicle       | 3                    | 0.1139                              | Yes                                | Two-way ANOVA Tukey post hoc multiple comparison test | 0.0001                |                                         |                       |
|                          | NRF2A         | 3                    | 0.9999                              | Yes                                |                                                       |                       |                                         |                       |
| STA_pERK5TEV ERK5WT      | Vehicle       | 5                    | 0.3254                              | Yes                                | Two-way ANOVA Tukey post hoc multiple comparison test | 0.00001               |                                         |                       |
|                          | GM-CSF        | 5                    | 0.4745                              | Yes                                |                                                       |                       |                                         |                       |
| STA_pERK5TEV GM-CSF      | ERK5WT        | 5                    | 0.4745                              | Yes                                | Two-way ANOVA Tukey post hoc multiple comparison test | 0.00001               |                                         |                       |
|                          | ERK5b         | 5                    | 0.2736                              | Yes                                |                                                       |                       |                                         |                       |
| STA_pERK5S496 ERK5WT     | Vehicle       | 5                    | 0.1185                              | Yes                                | Two-way ANOVA Tukey post hoc multiple comparison test | 0.003116              |                                         |                       |
|                          | GM-CSF        | 5                    | 0.6920                              | Yes                                |                                                       |                       |                                         |                       |
| STA_pERK5S496 GM-CSF     | ERK5WT        | 5                    | 0.5920                              | Yes                                | Two-way ANOVA Tukey post hoc multiple comparison test | 0.022569              |                                         |                       |
|                          | ERK5b         | 5                    | 0.2545                              | Yes                                |                                                       |                       |                                         |                       |
| STA_KL.F2 ERK5WT         | Vehicle       | 5                    | 0.3254                              | Yes                                | Two-way ANOVA Tukey post hoc multiple comparison test | 0.000046              |                                         |                       |
|                          | GM-CSF        | 5                    | 0.2438                              | Yes                                |                                                       |                       |                                         |                       |
| STA_KL.F2 GM-CSF         | ERK5WT        | 5                    | 0.2438                              | Yes                                | Two-way ANOVA Tukey post hoc multiple comparison test | 0.000169              |                                         |                       |
|                          | ERK5b         | 5                    | 0.4092                              | Yes                                |                                                       |                       |                                         |                       |
| S7B_pERK5TEV ERK5WT      | Vehicle       | 5                    | 0.3254                              | Yes                                | Two-way ANOVA Tukey post hoc multiple comparison test | 0.000116              |                                         |                       |
|                          | GM-CSF        | 5                    | 0.6875                              | Yes                                |                                                       |                       |                                         |                       |
| S7B_pERK5TEV GM-CSF      | ERK5WT        | 5                    | 0.6925                              | Yes                                | Two-way ANOVA Tukey post hoc multiple comparison test | 0.000224              |                                         |                       |
|                          | ERK5TEYm      | 5                    | 0.4168                              | Yes                                |                                                       |                       |                                         |                       |
| S7B_pERK5S496 ERK5WT     | Vehicle       | 5                    | 0.3254                              | Yes                                | Two-way ANOVA Tukey post hoc multiple comparison test | 0.000065              |                                         |                       |
|                          | GM-CSF        | 5                    | 0.7752                              | Yes                                |                                                       |                       |                                         |                       |
| S7B_pERK5S496 GM-CSF     | ERK5WT        | 5                    | 0.7752                              | Yes                                | Two-way ANOVA Tukey post hoc multiple comparison test | 0.55598               |                                         |                       |
|                          | ERK5TEYm      | 5                    | 0.4689                              | Yes                                |                                                       |                       |                                         |                       |
| S7B_KL.F2 ERK5WT         | Vehicle       | 5                    | 0.3254                              | Yes                                | Two-way ANOVA Tukey post hoc multiple comparison test | 0.000008              |                                         |                       |
|                          | GM-CSF        | 5                    | 0.3745                              | Yes                                |                                                       |                       |                                         |                       |
| S7B_KL.F2 GM-CSF         | ERK5WT        | 5                    | 0.3745                              | Yes                                | Two-way ANOVA Tukey post hoc multiple comparison test | 0.000007              |                                         |                       |
|                          | ERK5TEYm      | 5                    | 0.953                               | Yes                                |                                                       |                       |                                         |                       |
| S7C_pERK5TEV Vehicle     | Vehicle       | 5                    | 0.3254                              | Yes                                | Two-way ANOVA Tukey post hoc multiple comparison test | 0.000008              |                                         |                       |
|                          | GM-CSF        | 5                    | 0.705                               | Yes                                |                                                       |                       |                                         |                       |
| S7C_pERK5TEV GM-CSF      | Vehicle       | 5                    | 0.705                               | Yes                                | Two-way ANOVA Tukey post hoc multiple comparison test | 0.000079              |                                         |                       |
|                          | AX15836       | 5                    | 0.9187                              | Yes                                |                                                       |                       |                                         |                       |
| S7C_pERK5S496 ERK5WT     | Vehicle       | 5                    | 0.3254                              | Yes                                | Two-way ANOVA Tukey post hoc multiple comparison test | 0.000011              |                                         |                       |
|                          | GM-CSF        | 5                    | 0.2834                              | Yes                                |                                                       |                       |                                         |                       |
| S7C_pERK5S496 GM-CSF     | Vehicle       | 5                    | 0.2834                              | Yes                                | Two-way ANOVA Tukey post hoc multiple comparison test | 0.001438              |                                         |                       |
|                          | AX15836       | 5                    | 0.9917                              | Yes                                |                                                       |                       |                                         |                       |
| S7C_KL.F2 ERK5WT         | Vehicle       | 5                    | 0.3254                              | Yes                                | Two-way ANOVA Tukey post hoc multiple comparison test | 0.00011               |                                         |                       |
|                          | GM-CSF        | 5                    | 0.0834                              | Yes                                |                                                       |                       |                                         |                       |
| S7C_KL.F2 GM-CSF         | Vehicle       | 5                    | 0.0834                              | Yes                                | Two-way ANOVA Tukey post hoc multiple comparison test | 0.000004              |                                         |                       |
|                          | AX15836       | 5                    | 0.3654                              | Yes                                |                                                       |                       |                                         |                       |
| S7D_pERK5TEV Vehicle     | Vehicle       | 5                    | 0.3254                              | Yes                                | Two-way ANOVA Tukey post hoc multiple comparison test | 0.000001              |                                         |                       |
|                          | GM-CSF        | 5                    | 0.854                               | Yes                                |                                                       |                       |                                         |                       |
| S7D_pERK5TEV GM-CSF      | Vehicle       | 5                    | 0.854                               | Yes                                | Two-way ANOVA Tukey post hoc multiple comparison test | 0.000003              |                                         |                       |
|                          | XMD8-02       | 5                    | 0.127                               | Yes                                |                                                       |                       |                                         |                       |
| S7D_pERK5S496 ERK5WT     | Vehicle       | 5                    | 0.3254                              | Yes                                | Two-way ANOVA Tukey post hoc multiple comparison test | 0.000039              |                                         |                       |
|                          | GM-CSF        | 5                    | 0.6835                              | Yes                                |                                                       |                       |                                         |                       |
| S7D_pERK5S496 GM-CSF     | Vehicle       | 5                    | 0.6835                              | Yes                                | Two-way ANOVA Tukey post hoc multiple comparison test | 0.000278              |                                         |                       |
|                          | XMD8-02       | 5                    | 0.7147                              | Yes                                |                                                       |                       |                                         |                       |
| S7D_KL.F2 ERK5WT         | Vehicle       | 5                    | 0.314                               | Yes                                | Two-way ANOVA Tukey post hoc multiple comparison test | 0.002625              |                                         |                       |
|                          | GM-CSF        | 5                    | 0.237                               | Yes                                |                                                       |                       |                                         |                       |
| S7D_KL.F2 GM-CSF         | Vehicle       | 5                    | 0.237                               | Yes                                | Two-way ANOVA Tukey post hoc multiple comparison test | 0.000331              |                                         |                       |
|                          | XMD8-02       | 5                    | 0.2969                              | Yes                                |                                                       |                       |                                         |                       |
| S7E_pERK5TEV ERK5WT      | Vehicle       | 5                    | 0.3254                              | Yes                                | Two-way ANOVA Tukey post hoc multiple comparison test | 0.000005              |                                         |                       |
|                          | GM-CSF        | 5                    | 0.9697                              | Yes                                |                                                       |                       |                                         |                       |
| S7E_pERK5TEV GM-CSF      | ERK5WT        | 5                    | 0.9697                              | Yes                                | Two-way ANOVA Tukey post hoc multiple comparison test | 0.999999              |                                         |                       |
|                          | ERK5S496A     | 5                    | 0.314                               | Yes                                |                                                       |                       |                                         |                       |
| S7E_ERK5S496 ERK5WT      | Vehicle       | 5                    | 0.314                               | Yes                                | Two-way ANOVA Tukey post hoc multiple comparison test | 0.002071              |                                         |                       |
|                          | GM-CSF        | 5                    | 0.3806                              | Yes                                |                                                       |                       |                                         |                       |
| S7E_ERK5S496 GM-CSF      | ERK5WT        | 5                    | 0.3806                              | Yes                                | Two-way ANOVA Tukey post hoc multiple comparison test | 0.011321              |                                         |                       |
|                          | ERK5S496A     | 5                    | 0.2237                              | Yes                                |                                                       |                       |                                         |                       |
| S7E_KL.F2 Vehicle ERK5WT | Vehicle       | 5                    | 0.3254                              | Yes                                | Two-way ANOVA Tukey post hoc multiple comparison test | 0.019                 |                                         |                       |
|                          | GM-CSF        | 5                    | 0.854                               | Yes                                |                                                       |                       |                                         |                       |
| S7F_p90RSK ERK5WT        | Vehicle       | 5                    | 0.3254                              | Yes                                | Two-way ANOVA Tukey post hoc multiple comparison test | 0.000001              |                                         |                       |
|                          | ox.LD         | 5                    | 0.5784                              | Yes                                |                                                       |                       |                                         |                       |
| S7F_p90RSK ox.LD         | ERK5WT        | 5                    | 0.5784                              | Yes                                | Two-way ANOVA Tukey post hoc multiple comparison test | 0.000029              |                                         |                       |
|                          | ERK5TEYm      | 5                    | 0.9069                              | Yes                                |                                                       |                       |                                         |                       |
| S7F_pERK5S496 ERK5WT     | Vehicle       | 5                    | 0.3254                              | Yes                                | Two-way ANOVA Tukey post hoc multiple comparison test | 0.00599               |                                         |                       |
|                          | GM-CSF        | 5                    | 0.3338                              | Yes                                |                                                       |                       |                                         |                       |
| S7F_TNFa ERK5WT          | Vehicle       | 5                    | 0.3254                              | Yes                                | Two-way ANOVA Tukey post hoc multiple comparison test | 0.000001              |                                         |                       |
|                          | ox.LD         | 5                    | 0.7902                              | Yes                                |                                                       |                       |                                         |                       |
| S7F_TNFa ox.LD           | ERK5WT        | 5                    | 0.4863                              | Yes                                | Two-way ANOVA Tukey post hoc multiple comparison test | 0.000005              |                                         |                       |
|                          | ERK5TEYm      | 5                    | 0.3763                              | Yes                                |                                                       |                       |                                         |                       |
| S7Gp_p90RSK Vehicle      | Vehicle       | 5                    | 0.3254                              | Yes                                | Two-way ANOVA Tukey post hoc multiple comparison test | 0.00006               |                                         |                       |
|                          | GM-CSF        | 5                    | 0.0884                              | Yes                                |                                                       |                       |                                         |                       |
| S7G_pERK5 S496 ERK5WT    | Vehicle       | 5                    | 0.3254                              | Yes                                | Two-way ANOVA Tukey post hoc multiple comparison test | 0.000001              |                                         |                       |
|                          | GM-CSF        | 5                    | 0.9421                              | Yes                                |                                                       |                       |                                         |                       |
| S7G_TNFa ERK5WT          | Vehicle       | 5                    | 0.3254                              | Yes                                | Two-way ANOVA Tukey post hoc multiple comparison test | 0.025                 |                                         |                       |
|                          | GM-CSF        | 5                    | 0.8333                              | Yes                                |                                                       |                       |                                         |                       |
| S7H_p90RSK Vehicle       | Vehicle       | 5                    | 0.3254                              | Yes                                | Two-way ANOVA Tukey post hoc multiple comparison test | 0.007                 |                                         |                       |
|                          | ox.LD         | 5                    | 0.4272                              | Yes                                |                                                       |                       |                                         |                       |
| S7H_pERK5S496 Vehicle    | Vehicle       | 5                    | 0.3254                              | Yes                                | Two-way ANOVA Tukey post hoc multiple comparison test | 0.000001              |                                         |                       |
|                          | ox.LD         | 5                    | 0.4168                              | Yes                                |                                                       |                       |                                         |                       |
| S7H_pERK5S496 ox.LD      | Vehicle       | 5                    | 0.3254                              | Yes                                | Two-way ANOVA Tukey post hoc multiple comparison test | 0.000001              |                                         |                       |
|                          | AX15836       | 5                    | 0.2699                              | Yes                                |                                                       |                       |                                         |                       |
| S7H_TNFa Vehicle         | Vehicle       | 5                    | 0.3254                              | Yes                                | Two-way ANOVA Tukey post hoc multiple comparison test | 0.000001              |                                         |                       |
|                          | ox.LD         | 5                    | 0.3249                              | Yes                                |                                                       |                       |                                         |                       |
| S7H_TNFa ox.LD           | Vehicle       | 5                    | 0.5842                              | Yes                                | Two-way ANOVA Tukey post hoc multiple comparison test | 0.000001              |                                         |                       |
|                          | AX15836       | 5                    | 0.1718                              | Yes                                |                                                       |                       |                                         |                       |
| S7I_p90RSK Vehicle       | Vehicle       | 5                    | 0.3254                              | Yes                                | Two-way ANOVA Tukey post hoc multiple comparison test | 0.0011                |                                         |                       |
|                          | ox.LD         | 5                    | 0.1185                              | Yes                                |                                                       |                       |                                         |                       |
| S7I_pERK5S496 Vehicle    | Vehicle       | 5                    | 0.3254                              | Yes                                | Two-way ANOVA Tukey post hoc multiple comparison test | 0.000047              |                                         |                       |
|                          | ox.LD         | 5                    | 0.7995                              | Yes                                |                                                       |                       |                                         |                       |
| S7I_pERK5S496 ox.LD      | Vehicle       | 5                    | 0.7995                              | Yes                                | Two-way ANOVA Tukey post hoc multiple comparison test | 0.000124              |                                         |                       |
|                          | XMD8-02       | 5                    | 0.3623                              | Yes                                |                                                       |                       |                                         |                       |
| S7L TNFa Vehicle         | Vehicle       | 5                    | 0.3254                              | Yes                                | Two-way ANOVA Tukey post hoc multiple comparison test | 0.000116              |                                         |                       |
|                          | ox.LD         | 5                    | 0.8936                              | Yes                                |                                                       |                       |                                         |                       |
| S7L TNFa ox.LD           | Vehicle       | 5                    | 0.8938                              | Yes                                | Two-way ANOVA Tukey post hoc multiple comparison test | 0.001508              |                                         |                       |
|                          | XMD8-02       | 5                    | 0.5012                              | Yes                                |                                                       |                       |                                         |                       |
| S8B: WT                  | NCD           | 3 (NRF2 SUMOylation) | 0.9999                              | Yes                                | Two-way ANOVA Tukey post hoc multiple comparison test | 0.000176              |                                         |                       |
|                          | HFID          | 3 (NRF2 SUMOylation) | 0.1245                              | Yes                                |                                                       |                       |                                         |                       |
| S8B: HFID                | WT            | 3 (NRF2 SUMOylation) | 0.1245                              | Yes                                | Two-way ANOVA Tukey post hoc multiple comparison test | 0.000708              |                                         |                       |
|                          | ERK5 S496A KI | 3 (NRF2 SUMOylation) | 0.9709                              | Yes                                |                                                       |                       |                                         |                       |
| S8C: TRX1 NRF2WT         | Vehicle       | 5                    | 0.9672                              | Yes                                | Two-way ANOVA Tukey post hoc multiple comparison test | 0.000001              |                                         |                       |
|                          | ox.LD         | 5                    | 0.6908                              | Yes                                |                                                       |                       |                                         |                       |
| S8C: TRX1 ox.LD          | WT            | 5                    | 0.8808                              | Yes                                | Two-way ANOVA Tukey post hoc multiple comparison test | 0.000362              |                                         |                       |
|                          | NRF2K518R     | 5                    | 0.4489                              | Yes                                |                                                       |                       |                                         |                       |
| S8C: HO1 NRF2WT          | Vehicle       | 5                    | 0.3254                              | Yes                                | Two-way ANOVA Tukey post hoc multiple comparison test | 0.000024              |                                         |                       |
|                          | ox.LD         | 5                    | 0.4484                              | Yes                                |                                                       |                       |                                         |                       |
| S8C: HO1 ox.LD           | WT            | 5                    | 0.4484                              | Yes                                | Two-way ANOVA Tukey post hoc multiple comparison test | 0.000089              |                                         |                       |
|                          | NRF2K518R     | 5                    | 0.7950                              | Yes                                |                                                       |                       |                                         |                       |
| S8C: CD36 NRF2WT         | Vehicle       | 5                    | 0.3254                              | Yes                                | Two-way ANOVA Tukey post hoc multiple comparison test | 0.004937              |                                         |                       |
|                          | ox.LD         | 5                    | 0.3474                              | Yes                                |                                                       |                       |                                         |                       |
| S8C: CD36 ox.LD          | WT            | 5                    | 0.3474                              | Yes                                | Two-way ANOVA Tukey post hoc multiple comparison test | 0.025823              |                                         |                       |
|                          | NRF2K518R     | 5                    | 0.2238                              | Yes                                |                                                       |                       |                                         |                       |
| S8C: p21 NRF2WT          | Vehicle       | 5                    | 0.3254                              | Yes                                | Two-way ANOVA Tukey post hoc multiple comparison test | 0.000118              |                                         |                       |
|                          | ox.LD         | 5                    | 0.4597                              | Yes                                |                                                       |                       |                                         |                       |
| S8C: p21 ox.LD           | WT            | 5                    | 0.4597                              | Yes                                | Two-way ANOVA Tukey post hoc multiple comparison test | 0.000887              |                                         |                       |
|                          | NRF2K518R     | 5                    | 0.3365                              | Yes                                |                                                       |                       |                                         |                       |
| S8C: p16 NRF2WT          | Vehicle       | 5                    | 0.3254                              | Yes                                | Two-way ANOVA Tukey post hoc multiple comparison test | 0.000001              |                                         |                       |
|                          | ox.LD         | 5                    | 0.2686                              | Yes                                |                                                       |                       |                                         |                       |
| S8C: p16 ox.LD           | WT            | 5                    | 0.2686                              | Yes                                | Two-way ANOVA Tukey post hoc multiple comparison test | 0.000015              |                                         |                       |
|                          | NRF2K518R     | 5                    | 0.8893                              | Yes                                |                                                       |                       |                                         |                       |
| S8C: p53 NRF2WT          | Vehicle       | 5                    | 0.3254                              | Yes                                | Two-way ANOVA Tukey post hoc multiple comparison test | 0.000029              |                                         |                       |
|                          | ox.LD         | 5                    | 0.8773                              | Yes                                |                                                       |                       |                                         |                       |
| S8C: p53 ox.LD           | WT            | 5                    | 0.8773                              | Yes                                | Two-way ANOVA Tukey post hoc multiple comparison test | 0.001634              |                                         |                       |
|                          | NRF2K518R     | 5                    | 0.3983                              | Yes                                |                                                       |                       |                                         |                       |
| S8C: GAS6 NRF2WT         | Vehicle       | 5                    | 0.3254                              | Yes                                | Two-way ANOVA Tukey post hoc multiple comparison test | 0.00029               |                                         |                       |
|                          | ox.LD         | 5                    | 0.875                               | Yes                                |                                                       |                       |                                         |                       |
| S8C: GAS6 ox.LD          | WT            | 5                    | 0.875                               | Yes                                | Two-way ANOVA Tukey post hoc multiple comparison test | 0.000045              |                                         |                       |
|                          | NRF2K518R     | 5                    | 0.3381                              | Yes                                |                                                       |                       |                                         |                       |
| S8C: TNFa NRF2WT         | Vehicle       | 5                    | 0.32                                | Yes                                | Two-way ANOVA Tukey post hoc multiple comparison test | 0.0005                |                                         |                       |
|                          | ox.LD         | 5                    | 0.995                               | Yes                                |                                                       |                       |                                         |                       |
| S8C: TNFa ox.LD          | WT            | 5                    | 0.995                               | Yes                                | Two-way ANOVA Tukey post hoc multiple comparison test | 0.0271                |                                         |                       |
|                          | NRF2K518R     | 5                    | 0.24                                | Yes                                |                                                       |                       |                                         |                       |
| S8C: DNMT3a NRF2WT       | Vehicle       | 5                    | 0.314                               | Yes                                | Two-way ANOVA Tukey post hoc multiple comparison test | 0.003554              |                                         |                       |
|                          | ox.LD         | 5                    | 0.4207                              | Yes                                |                                                       |                       |                                         |                       |
| S8C: DNMT3a ox.LD        | WT            | 5                    | 0.4207                              | Yes                                | Two-way ANOVA Tukey post hoc multiple comparison test | 0.001581              |                                         |                       |
|                          | NRF2K518R     | 5                    | 0.6422                              | Yes                                |                                                       |                       |                                         |                       |
| S8C: AHR NRF2WT          | Vehicle       | 5                    | 0.3254                              | Yes                                | Two-way ANOVA Tukey post hoc multiple comparison test | 0.000012              |                                         |                       |
|                          | ox.LD         | 5                    | 0.2823                              | Yes                                |                                                       |                       |                                         |                       |
| S8C: AHR ox.LD           | WT            | 5                    | 0.2823                              | Yes                                | Two-way ANOVA Tukey post hoc multiple comparison test | 0.000072              |                                         |                       |
|                          | NRF2K518R     | 5                    | 0.077                               | Yes                                |                                                       |                       |                                         |                       |

| 2M (L-6 #1)         | WT            | 1716        | <0.0001                           | No                               | Non parametric unpaired Mann-Whitney test                                              | <0.0000000000000001   | Unpaired t test with Welch's correction | <0.0000000000000001 |
|---------------------|---------------|-------------|-----------------------------------|----------------------------------|----------------------------------------------------------------------------------------|-----------------------|-----------------------------------------|---------------------|
|                     | KI            | 1291        | <0.0001                           | No                               |                                                                                        |                       |                                         |                     |
|                     | WT            | 2417        | <0.0001                           | No                               |                                                                                        |                       |                                         |                     |
| 2M (L-6 #7)         | WT            | 1558        | <0.0001                           | No                               | Non parametric unpaired Mann-Whitney test                                              | 3.3887E-06            | Unpaired t test with Welch's correction | 0.000690363         |
|                     | KI            | 2817        | <0.0001                           | No                               |                                                                                        |                       |                                         |                     |
|                     | WT            | 2170        | <0.0001                           | No                               |                                                                                        |                       |                                         |                     |
| 2M (L-6 #9)         | WT            | 2536        | <0.0001                           | No                               | Non parametric unpaired Mann-Whitney test                                              | <0.0000000000000001   | Unpaired t test with Welch's correction | 4.2E-14             |
|                     | KI            | 1775        | <0.0001                           | No                               |                                                                                        |                       |                                         |                     |
|                     | WT            | 2170        | <0.0001                           | No                               |                                                                                        |                       |                                         |                     |
| S2D: TRX #5         | WT            | 122         | <0.0001                           | No                               | Non parametric unpaired Mann-Whitney test                                              | 0.000122289           | Unpaired t test with Welch's correction | 0.00033139          |
|                     | KI            | 202         | <0.0001                           | No                               |                                                                                        |                       |                                         |                     |
|                     | WT            | 2536        | <0.0001                           | No                               |                                                                                        |                       |                                         |                     |
| S2D: TRX #6         | WT            | 122         | <0.0001                           | No                               | Non parametric unpaired Mann-Whitney test                                              | 0.001532638           | Unpaired t test with Welch's correction | 0.00127231          |
|                     | KI            | 202         | <0.0001                           | No                               |                                                                                        |                       |                                         |                     |
|                     | WT            | 2536        | <0.0001                           | No                               |                                                                                        |                       |                                         |                     |
| S2D: DNMT3a #5      | WT            | 122         | <0.0001                           | No                               | Non parametric unpaired Mann-Whitney test                                              | 5.3E-13               | Unpaired t test with Welch's correction | 1.87604E-07         |
|                     | KI            | 1775        | <0.0001                           | No                               |                                                                                        |                       |                                         |                     |
|                     | WT            | 2536        | <0.0001                           | No                               |                                                                                        |                       |                                         |                     |
| S2D: DNMT3a #6      | WT            | 122         | <0.0001                           | No                               | Non parametric unpaired Mann-Whitney test                                              | 0.00107075            | Unpaired t test with Welch's correction | 0.000739619         |
|                     | KI            | 202         | <0.0001                           | No                               |                                                                                        |                       |                                         |                     |
|                     | WT            | 2536        | <0.0001                           | No                               |                                                                                        |                       |                                         |                     |
| S2D: GAS6 #5        | WT            | 122         | <0.0001                           | No                               | Non parametric unpaired Mann-Whitney test                                              | 8.99327E-07           | Unpaired t test with Welch's correction | 4.011757E-07        |
|                     | KI            | 202         | <0.0001                           | No                               |                                                                                        |                       |                                         |                     |
|                     | WT            | 2536        | <0.0001                           | No                               |                                                                                        |                       |                                         |                     |
| S2D: GAS6 #6        | WT            | 122         | <0.0001                           | No                               | Non parametric unpaired Mann-Whitney test                                              | 0.003054729           | Unpaired t test with Welch's correction | 0.001822599         |
|                     | KI            | 202         | <0.0001                           | No                               |                                                                                        |                       |                                         |                     |
|                     | WT            | 2536        | <0.0001                           | No                               |                                                                                        |                       |                                         |                     |
| S2D: TYRO3 #6       | WT            | 122         | <0.0001                           | No                               | Non parametric unpaired Mann-Whitney test                                              | 2.21841E-05           | Unpaired t test with Welch's correction | 0.000739053         |
|                     | KI            | 202         | <0.0001                           | No                               |                                                                                        |                       |                                         |                     |
|                     | WT            | 2536        | <0.0001                           | No                               |                                                                                        |                       |                                         |                     |
| S2D: L-6 #5         | WT            | 1775        | <0.0001                           | No                               | Non parametric unpaired Mann-Whitney test                                              | 1.71063E-10           | Unpaired t test with Welch's correction | 7.0627E-11          |
|                     | KI            | 2484        | <0.0001                           | No                               |                                                                                        |                       |                                         |                     |
|                     | WT            | 1781        | <0.0001                           | No                               |                                                                                        |                       |                                         |                     |
| S2E: Distance #5-#8 | WT            | 1781        | <0.0001                           | No                               | Non parametric unpaired Mann-Whitney test                                              | 2.09186E-09           | Unpaired t test with Welch's correction | 0.000906126         |
|                     | KI            | 2817        | <0.0001                           | No                               |                                                                                        |                       |                                         |                     |
|                     | WT            | 1858        | <0.0001                           | No                               |                                                                                        |                       |                                         |                     |
| S2H: p16 #7         | WT            | 2817        | <0.0001                           | No                               | Non parametric unpaired Mann-Whitney test                                              | <0.0000000000000001   | Unpaired t test with Welch's correction | <0.0000000000000001 |
|                     | KI            | 2370        | <0.0001                           | No                               |                                                                                        |                       |                                         |                     |
|                     | WT            | 1858        | <0.0001                           | No                               |                                                                                        |                       |                                         |                     |
| S2H: p16 #9         | WT            | 2817        | <0.0001                           | No                               | Non parametric unpaired Mann-Whitney test                                              | <0.0000000000000001   | Unpaired t test with Welch's correction | <0.0000000000000001 |
|                     | KI            | 2370        | <0.0001                           | No                               |                                                                                        |                       |                                         |                     |
|                     | WT            | 1716        | <0.0001                           | No                               |                                                                                        |                       |                                         |                     |
| S2H: p-PKC #1       | WT            | 1291        | <0.0001                           | No                               | Non parametric unpaired Mann-Whitney test                                              | <0.0000000000000001   | Unpaired t test with Welch's correction | <0.0000000000000001 |
|                     | KI            | 2817        | <0.0001                           | No                               |                                                                                        |                       |                                         |                     |
|                     | WT            | 1858        | <0.0001                           | No                               |                                                                                        |                       |                                         |                     |
| S2H: p-PKC #7       | WT            | 2817        | <0.0001                           | No                               | Non parametric unpaired Mann-Whitney test                                              | 6.22427E-08           | Unpaired t test with Welch's correction | 8.44638E-08         |
|                     | KI            | 2370        | <0.0001                           | No                               |                                                                                        |                       |                                         |                     |
|                     | WT            | 2817        | <0.0001                           | No                               |                                                                                        |                       |                                         |                     |
| S2H: p-PKC #9       | WT            | 2370        | <0.0001                           | No                               | Non parametric unpaired Mann-Whitney test                                              | <0.0000000000000001   | Unpaired t test with Welch's correction | <0.0000000000000001 |
|                     | KI            | 701         | <0.0001                           | No                               |                                                                                        |                       |                                         |                     |
|                     | WT            | 701         | <0.0001                           | No                               |                                                                                        |                       |                                         |                     |
| S2K(Top2B)          | WT            | 701         | <0.0001                           | No                               | Non parametric unpaired Mann-Whitney test                                              | 0.0671                | Unpaired t test with Welch's correction | 0.0037              |
|                     | ERK5 S496A KI | 575         | <0.0001                           | No                               |                                                                                        |                       |                                         |                     |
|                     | WT            | 701         | 0.0671                            | No                               |                                                                                        |                       |                                         |                     |
| S2K(TRX)            | WT            | 701         | <0.0001                           | No                               | Non parametric unpaired Mann-Whitney test                                              | 0.0672                | Unpaired t test with Welch's correction | 0.0233              |
|                     | ERK5 S496A KI | 575         | 0.3646                            | Yes                              |                                                                                        |                       |                                         |                     |
|                     | WT            | 701         | <0.0001                           | No                               |                                                                                        |                       |                                         |                     |
| S2K(K67)            | WT            | 701         | <0.0001                           | No                               | Non parametric unpaired Mann-Whitney test                                              | 0.4144                | Unpaired t test with Welch's correction | 0.0686              |
|                     | ERK5 S496A KI | 575         | <0.0001                           | No                               |                                                                                        |                       |                                         |                     |
|                     | WT            | 701         | <0.0001                           | No                               |                                                                                        |                       |                                         |                     |
| S2K(p53)            | WT            | 701         | <0.0001                           | No                               | Non parametric unpaired Mann-Whitney test                                              | 0.5338                | Unpaired t test with Welch's correction | 0.2765              |
|                     | ERK5 S496A KI | 575         | <0.0001                           | No                               |                                                                                        |                       |                                         |                     |
|                     | WT            | 701         | <0.0001                           | No                               |                                                                                        |                       |                                         |                     |
| S2K(Tyr3)           | WT            | 701         | <0.0001                           | No                               | Non parametric unpaired Mann-Whitney test                                              | 0.0206                | Unpaired t test with Welch's correction | 0.0139              |
|                     | ERK5 S496A KI | 575         | 0.0003                            | No                               |                                                                                        |                       |                                         |                     |
|                     | WT            | 701         | <0.0001                           | No                               |                                                                                        |                       |                                         |                     |
| S2K(DNMT3a)         | WT            | 701         | <0.0001                           | No                               | Non parametric unpaired Mann-Whitney test                                              | 0.0065                | Unpaired t test with Welch's correction | 0.0022              |
|                     | ERK5 S496A KI | 575         | <0.0001                           | No                               |                                                                                        |                       |                                         |                     |
|                     | WT            | 701         | <0.0001                           | No                               |                                                                                        |                       |                                         |                     |
| S2K(Gas6)           | WT            | 701         | <0.0001                           | No                               | Non parametric unpaired Mann-Whitney test                                              | 3.11022E-05           | Unpaired t test with Welch's correction | 1.47754E-05         |
|                     | ERK5 S496A KI | 575         | 0.0286                            | No                               |                                                                                        |                       |                                         |                     |
|                     | WT            | 701         | <0.0001                           | No                               |                                                                                        |                       |                                         |                     |
| S2K(L-6)            | WT            | 701         | <0.0001                           | No                               | Non parametric unpaired Mann-Whitney test                                              | 3.11183E-06           | Unpaired t test with Welch's correction | 0.0687              |
|                     | ERK5 S496A KI | 575         | 0.0001                            | No                               |                                                                                        |                       |                                         |                     |
|                     | WT            | 701         | <0.0001                           | No                               |                                                                                        |                       |                                         |                     |
| Figure #            | Group         | Cell number | D'Agostino & Pearson test P value | D'Agostino & Pearson test Passed | Applied statistical test(s) and results                                                | P (or Adjusted) Value |                                         |                     |
| S2G                 | p16           | 14069       | <0.0001                           | No                               | Non parametric Kruskal-Wallis test followed by Dunn post hoc multiple comparison tests | <0.0000000000000001   |                                         |                     |
|                     | p53           | 14069       | <0.0001                           | No                               |                                                                                        |                       |                                         |                     |
|                     | p-TERF2IP     | 14069       | <0.0001                           | No                               |                                                                                        |                       |                                         |                     |
| S2G                 | p53           | 14069       | <0.0001                           | No                               | Non parametric Kruskal-Wallis test followed by Dunn post hoc multiple comparison tests | <0.0000000000000001   |                                         |                     |
|                     | p16           | 14069       | <0.0001                           | No                               |                                                                                        |                       |                                         |                     |
|                     | p-TERF2IP     | 14069       | <0.0001                           | No                               |                                                                                        |                       |                                         |                     |
