# Supplementary material
Source: PubMed Central journal article supplement (PMC10357365)
Supplement: NIHMS1902642-supplement-322017_Supplemental_Table_5.pdf [file NIHMS1902642-supplement-322017_Supplemental_Table_5.pdf]

| <b>Antibodies (For IMC)</b>     | <b>Company</b>             | <b>Cat#</b>  | <b>RRID number</b> |
|---------------------------------|----------------------------|--------------|--------------------|
| CD31                            | R&D                        | AF3628       | RRID:AB_2161028    |
| p-Tyrosine                      | Fluidigm                   | 3144024D     | NA                 |
| CD107b                          | Invitrogen                 | 14-1072-85   | RRID:AB_657562     |
| TOP2b                           | R&D                        | MAB6348      | RRID:AB_10889629   |
| a-SMA                           | Fluidigm                   | 3141017D     | RRID:AB_2890139    |
| Thioredoxin (Trx)               | Proteintech                | 14999-1-AP   | RRID:AB_2272597    |
| CD11b                           | Fluidigm                   | 3149028D     | RRID:AB_2891189    |
| p-PKCz (T410)                   | Abclonal                   | AP0520       | RRID:AB_2771419    |
| p-TERF2IP (S205)                | Homemade                   |              | NA                 |
| p-AMPK alpha (T172)             | Affinity Biosciences       | AF3423       | RRID:AB_2834865    |
| CCR7                            | Biorbyt                    | orb547290    | NA                 |
| Tyro3                           | R&D                        | MAB759       | RRID:AB_2210988    |
| Gas6                            | Abclonal                   | A8545        | RRID:AB_2769575    |
| p90RSK1                         | StressMarq                 | SPC-147F     | RRID:AB_2253959    |
| p-p90RSK (S380)                 | Bioworld                   | BS4870       | NA                 |
| ERG                             | Biorbyt                    | orb192164    | NA                 |
| p16                             | Abcam                      | ab54210      | RRID:AB_881819     |
| IL-6                            | R&D                        | AF-406-NA    | RRID:AB_354478     |
| Arginase-1                      | Fluidigm                   | 3164027D     | RRID:AB_2891145    |
| p53                             | Abcam                      | ab131442     | RRID:AB_11155283   |
| vWF                             | Millipore                  | AB7356       | RRID:AB_92216      |
| Ki67                            | Fluidigm                   | 3168022D     | RRID:AB_2811061    |
| DNMT3a                          | Novus                      | NB120-13888  | RRID:AB_789607     |
| p-ERK1/2                        | Fluidigm                   | 3171021D     | RRID:AB_2927686    |
| p-JAK2                          | Abcam                      | ab219728     | RRID:AB_219728     |
| YAP                             | Abcam                      | ab56701      | RRID:AB_2219140    |
| p-YAP (Y357)                    | Abcam                      | ab62751      | RRID:AB_956486     |
| Ir DNA-intercalator             | Fluidigm                   | 201192A      | NA                 |
| Ir DNA-intercalator             | Fluidigm                   | 201192A      | NA                 |
| <b>Antibodies (For non-IMC)</b> | <b>Company</b>             | <b>Cat#</b>  | <b>RRID number</b> |
| p16                             | Biorbyt                    | orb228122    | NA                 |
| phospho-ERK5 S496               | Biorbyt                    | orb5183      | RRID:AB_10934187   |
| NRF2                            | Genetex                    | GTX103322    | RRID:AB_1950993    |
| thioredoxin                     | Proteintech                | 14999-1 AP20 | RRID:AB_2272597    |
| p90RSK                          | R&D Systems                | MAB 2056     | NA                 |
| a-tubulin                       | Sigma-Aldrich              | T5168        | RRID:AB_477579     |
| phospho-ERK5 TEY                | Cell Signaling Technology  | 3371         | RRID:AB_2140424    |
| ERK5                            | Cell Signaling Technology  | 3372         | RRID:AB_330491     |
| phospho-p90RSK                  | Cell Signaling Technology  | 9341         | RRID:AB_330753     |
| p21                             | Cell Signaling Technology  | 2947         | RRID:AB_823586     |
| p53                             | Cell Signaling Technology, | 9282         | RRID:AB_331476     |
| DNMT3A                          | Novus Biologicals          | NB12013888   | RRID:AB_789607     |
| TNF $\alpha$                    | Novus Biologicals          | NBP1-19532   | RRID:AB_1643202    |
| 53BP1                           | Novus Biologicals          | NBP1-19532   | RRID:AB_10003037   |
| KLF2                            | Novus Biologicals          | NBP2-61812   | NA                 |
| Gas6                            | Bioss                      | BS-7549R     | NA                 |
| heme oxygenase 1 (HO-1)         | Abcam                      | ab13248      | RRID:AB_2118663    |
| CD36                            | Cayman chemicals           | 100011       | RRID:AB_327790     |
| AHR                             | Invitrogen                 | MA1-514      | RRID:AB_2273723    |
| PCNA                            | Invitrogen                 | 13-3900      | RRID:AB_86593      |
| SUMO2/3                         | MBL Life Sciences          | M114-3       | RRID:AB_592769     |
| Lamin B                         | LSBio                      | LS-C82208    | RRID:AB_1655944    |

|                                |                         |                                                                                                                                           |                    |
|--------------------------------|-------------------------|-------------------------------------------------------------------------------------------------------------------------------------------|--------------------|
| Mac3                           | BD biosciences          | 550292                                                                                                                                    | RRID:AB_393587     |
| Ki67                           | abcam                   | ab92742                                                                                                                                   | RRID:AB_10562976   |
| goat anti-rabbit               | Thermofisher scientiifc | A-21038                                                                                                                                   | RRID:AB_2535709    |
| goat anti-mouse                | Thermofisher scientiifc | A-21237                                                                                                                                   | RRID:AB_2535806    |
| F4/80                          | BD biosciences          | 565410                                                                                                                                    | RRID:AB_10526888   |
| CD11b                          | BD biosciences          | 553310                                                                                                                                    | RRID:AB_394774     |
| HRP - GAR                      | Novus Biologicals       | NB7160                                                                                                                                    | RRID:AB_524669     |
| HRP - GAM                      | Novus Biologicals       | NB7539                                                                                                                                    | RRID:AB_10126266   |
| anti-rabbit IgG                | Abcam                   | ab37415                                                                                                                                   | RRID:AB_2631996    |
| <b>Cells</b>                   | <b>Company</b>          | <b>Cat#</b>                                                                                                                               | <b>RRID number</b> |
| L929                           | ATCC                    | NCTC clone 929 CCL-1™                                                                                                                     | RRID:CVCL_0462     |
| <b>Software Tools</b>          | <b>Source</b>           | <b>Cat#</b>                                                                                                                               | <b>RRID number</b> |
| Image J                        | SciCrunch Registry      | <a href="https://imagej.net/">https://imagej.net/</a>                                                                                     | RRID:SCR_003070    |
| Cuttdiff                       | SciCrunch Registry      | <a href="http://cufflinks.cbcb.umd.edu/">http://cufflinks.cbcb.umd.edu/</a>                                                               | RRID:SCR_001647    |
| GSEA                           | SciCrunch Registry      | <a href="http://bioconductor.org/packages/devel/bioc/html/SegGSEA.html">http://bioconductor.org/packages/devel/bioc/html/SegGSEA.html</a> | RRID:SCR_005724    |
| Flowjo                         | SciCrunch Registry      | <a href="https://www.flowjo.com/solutions/flowjo">https://www.flowjo.com/solutions/flowjo</a>                                             | RRID:SCR_008520    |
| Graphpad prism                 | SciCrunch Registry      | <a href="http://graphpad.com/">http://graphpad.com/</a>                                                                                   | RRID:SCR_002798    |
| Geneexpression omnibus         | SciCrunch Registry      | <a href="https://www.ncbi.nlm.nih.gov/geo/">https://www.ncbi.nlm.nih.gov/geo/</a>                                                         | RRID:SCR_005012    |
| <b>Mice</b>                    | <b>Company</b>          | <b>Cat#</b>                                                                                                                               | <b>RRID number</b> |
| C57BL/6 WT                     | Jackson Laboratory      | 664                                                                                                                                       | RRID:MGI:5658896   |
| <b>Plasmids</b>                | <b>Company</b>          | <b>Cat#</b>                                                                                                                               | <b>RRID number</b> |
| pAAV/D377Y-mPCSK9              | Addgene                 | Addgene_58376                                                                                                                             | RRID:Addgene_58376 |
| pRL-TK                         | Addgene                 | Addgene_11313                                                                                                                             | RRID:Addgene_11313 |
| <b>Instruments</b>             | <b>Company</b>          | <b>Cat#</b>                                                                                                                               | <b>RRID number</b> |
| Tissue processor- leica-TP1020 | Leica                   | TP1020                                                                                                                                    | NA                 |
| FLUOstar Omega                 | BMG LABTECH             | 415-101-AFL                                                                                                                               | NA                 |
